# Supplementary material for: YAP and TAZ are transcriptional co-activators of AP-1 proteins and STAT3 during breast cellular transformation
Source: eLife journal article supplement (doi:10.7554/elife.67312), 2021-08-31

**Figure 7-figure supplement 1**

**A All YAP/TAZ ChIP-seq Targets (1,507)**

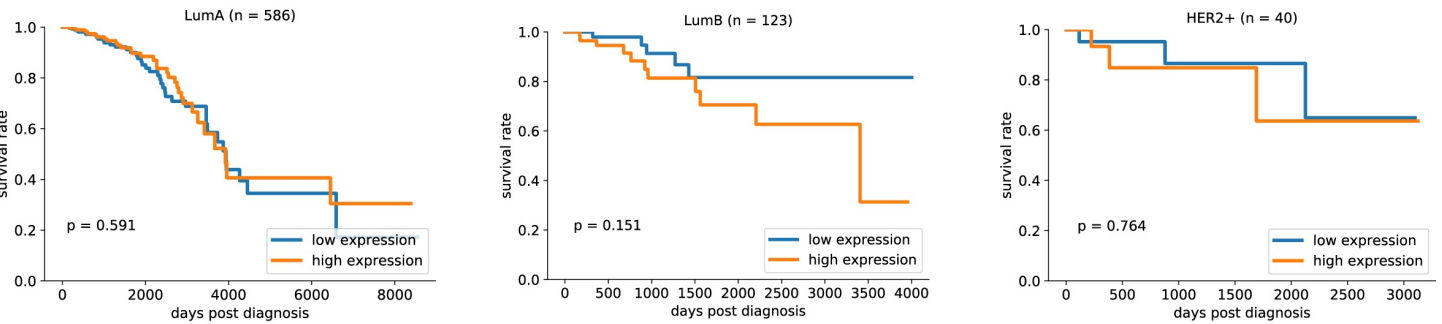

**B YAP/TAZ ChIP-seq Targets, AP-1 motif (271)**

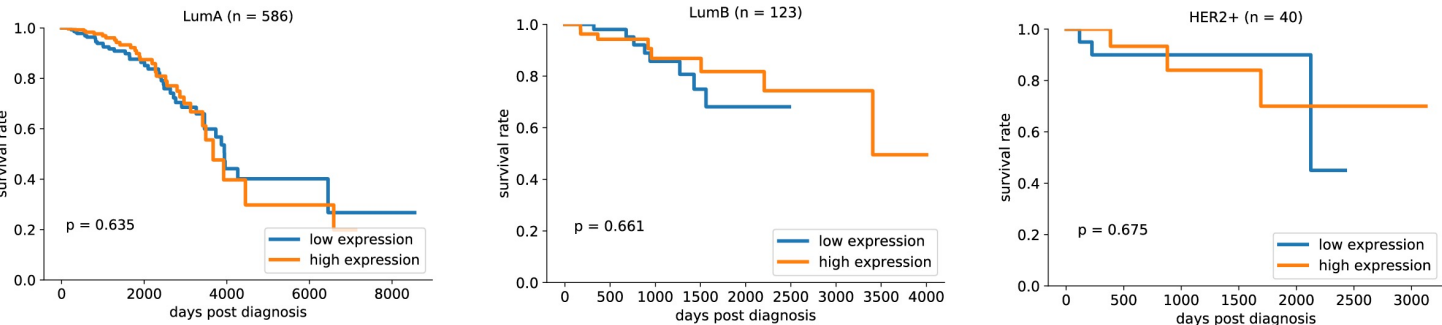

**C YAP/TAZ ChIP-seq Targets, TEAD motif (377)**

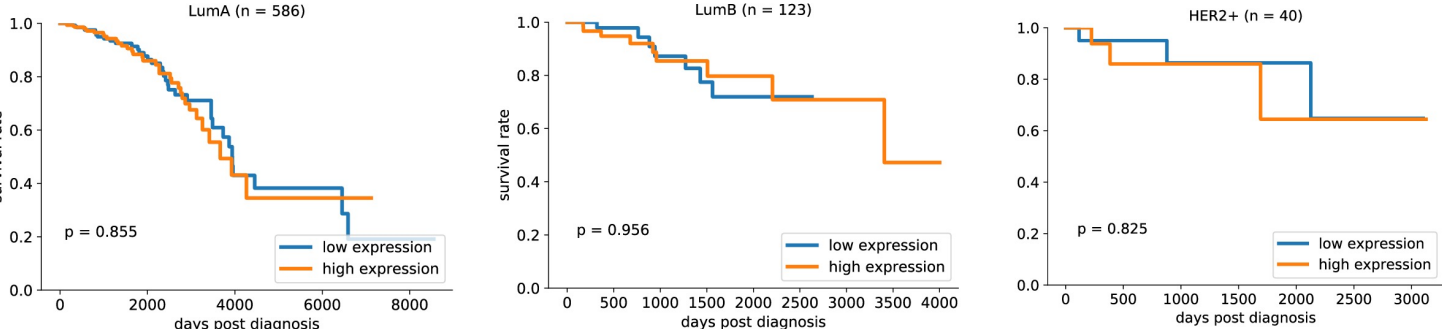

**D YAP/TAZ ChIP-seq Targets, AP-1/TEAD motif (155)**

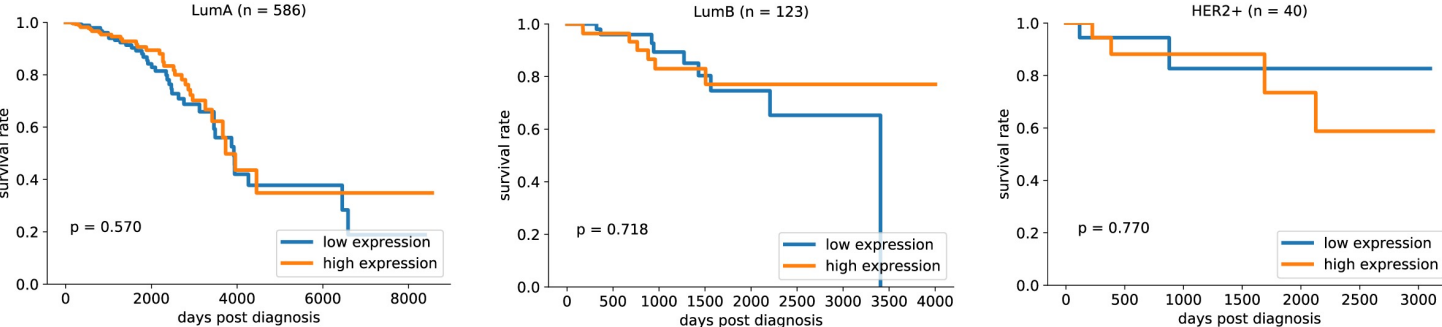

Supplement: supp [file elife-67312-supp-v1.zip]
