# Supplementary material for: YAP and TAZ are transcriptional co-activators of AP-1 proteins and STAT3 during breast cellular transformation
Source: eLife journal article supplement (doi:10.7554/elife.67312), 2021-08-31
Supplement: supp [file elife-67312-supp-v1.zip]

Archive with 15 entries (15 files):
- elife_poa_e67312_Supplementary_file_1.pdf
- elife_poa_e67312_Supplementary_file_2.xlsx
- elife_poa_e67312_Supplementary_file_3.xlsx
- elife_poa_e67312_Supplementary_file_4.xlsx
- elife_poa_e67312_Supplementary_file_5.xlsx
- elife_poa_e67312_Transparent_Reporting_File.pdf
- elife_poa_e67312_Figure_2_figure_supplement_1.pdf
- elife_poa_e67312_Figure_3_figure_supplement_1.pdf
- elife_poa_e67312_Figure_4_figure_supplement_1.pdf
- elife_poa_e67312_Figure_5_figure_supplement_1.pdf
- elife_poa_e67312_Figure_6_figure_supplement_1.pdf
- elife_poa_e67312_Figure_6_figure_supplement_2.pdf
- elife_poa_e67312_Figure_6_figure_supplement_3.pdf
- elife_poa_e67312_Figure_7_figure_supplement_1.pdf
- elife_poa_e67312_Figure_7_figure_supplement_2.pdf
