# Supplementary material for: YAP and TAZ are transcriptional co-activators of AP-1 proteins and STAT3 during breast cellular transformation
Source: eLife journal article supplement (doi:10.7554/elife.67312), 2021-08-31
Supplement: supp [file elife-67312-supp-v1.zip › elife_poa_e67312_Supplementary_file_1.pdf]

**Table S1.** Correlation between (A) biological replicates and (B) number of binding sites of the indicated proteins in ER-Src (ethanol or tamoxifen; wild-type and YAP or TAZ knockout (KO) and MDA-MB-231 cells.

**A. ChIP-seq signal correlation coefficient between replicates**

| TF          | YAP   | TAZ   | TEAD  | STAT3 | JUNB  |
|-------------|-------|-------|-------|-------|-------|
| ER-Src; ETH | 0.705 | 0.763 | 0.779 | 0.890 | 0.918 |
| ER-Src; TAM | 0.683 | 0.855 | 0.772 | 0.950 | 0.912 |
| MDA-MB-231  | 0.908 | 0.886 | 0.878 | 0.668 | 0.915 |

**B. ChIP-seq IDR peak numbers**

|             | YAP    | TAZ    | TEAD   | STAT3  | JUNB   |
|-------------|--------|--------|--------|--------|--------|
| ER-Src; ETH | 25,975 | 32,587 | 15,486 | 3,680  | 37,886 |
| ER-Src; TAM | 22,509 | 37,888 | 19,467 | 18,243 | 44,952 |
| MDA-MB-231  | 43,387 | 32,820 | 15,870 | 6,316  | 59,271 |

|             | YAP in TAZ KO | TAZ in YAP KO |
|-------------|---------------|---------------|
| ER-Src; ETH | 29,335        | 49,118        |
| ER-Src; TAM | 39,230        | 35,221        |
