# Supplementary material for: YAP and TAZ are transcriptional co-activators of AP-1 proteins and STAT3 during breast cellular transformation
Source: eLife journal article supplement (doi:10.7554/elife.67312), 2021-08-31
Supplement: supp [file elife-67312-supp-v1.zip › elife_poa_e67312_Supplementary_file_2.xlsx]

## Sheet: GO enrichment
GO Term	Description	-log10(q-value), TAZ-specific	-log10(q-value), YAP-specific	-log10(q-value), shared
GO:0090304	nucleic acid metabolic process	13.64	0	0
GO:0006139	nucleobase-containing compound metabolic process	12.11	0	0
GO:0034470	ncRNA processing	11.92	0	0
GO:0006396	RNA processing	11.79	0	0
GO:0034660	ncRNA metabolic process	11.44	0	0
GO:0046483	heterocycle metabolic process	11.12	0	0
GO:0016070	RNA metabolic process	11.09	0	0
GO:0034641	cellular nitrogen compound metabolic process	10.81	0	0
GO:0006725	cellular aromatic compound metabolic process	10.73	0	0
GO:1901360	organic cyclic compound metabolic process	9.43	0	0
GO:0006364	rRNA processing	6.15	0	0
GO:0006399	tRNA metabolic process	5.96	0	0
GO:0016072	rRNA metabolic process	5.72	0	0
GO:0044237	cellular metabolic process	5.34	0	0
GO:0070126	mitochondrial translational termination	5.04	0	0
GO:0009451	RNA modification	4.49	0	0
GO:0006415	translational termination	4.37	0	0
GO:0070125	mitochondrial translational elongation	3.92	0	0
GO:0008033	tRNA processing	3.85	0	0
GO:0008152	metabolic process	3.82	0	0
GO:0043624	cellular protein complex disassembly	3.32	0	0
GO:0043170	macromolecule metabolic process	3.21	0	0
GO:0051276	chromosome organization	3.18	0	0
GO:0043933	protein-containing complex subunit organization	3.16	0	0
GO:0019219	regulation of nucleobase-containing compound metabolic process	0	8.78	0
GO:0080090	regulation of primary metabolic process	0	7.94	0
GO:0051171	regulation of nitrogen compound metabolic process	0	7.87	0
GO:0060255	regulation of macromolecule metabolic process	0	7.8	0
GO:0051252	regulation of RNA metabolic process	0	7.47	0
GO:0006357	regulation of transcription by RNA polymerase II	0	7.25	0
GO:2000112	regulation of cellular macromolecule biosynthetic process	0	7.21	0
GO:0010556	regulation of macromolecule biosynthetic process	0	7.2	0
GO:0019222	regulation of metabolic process	0	7.11	0
GO:0050794	regulation of cellular process	0	7.1	0
GO:0031323	regulation of cellular metabolic process	0	7.1	0
GO:0009889	regulation of biosynthetic process	0	7.09	0
GO:1903506	regulation of nucleic acid-templated transcription	0	7.08	0
GO:0031326	regulation of cellular biosynthetic process	0	7.06	0
GO:2001141	regulation of RNA biosynthetic process	0	7.03	0
GO:0006355	regulation of transcription, DNA-templated	0	6.63	0
GO:0010468	regulation of gene expression	0	6.45	0
GO:0050789	regulation of biological process	0	6.25	0
GO:0051172	negative regulation of nitrogen compound metabolic process	0	4.96	0
GO:0065007	biological regulation	0	4.55	0
GO:0010605	negative regulation of macromolecule metabolic process	0	3.97	0
GO:0031324	negative regulation of cellular metabolic process	0	3.81	0
GO:0006325	chromatin organization	0	3.58	0
GO:1903507	negative regulation of nucleic acid-templated transcription	0	3.5	0
GO:0051253	negative regulation of RNA metabolic process	0	3.49	0
GO:1902679	negative regulation of RNA biosynthetic process	0	3.48	0
GO:0045934	negative regulation of nucleobase-containing compound metabolic process	0	3.47	0
GO:0009892	negative regulation of metabolic process	0	3.23	0
GO:0045935	positive regulation of nucleobase-containing compound metabolic process	0	3.03	0
GO:0010558	negative regulation of macromolecule biosynthetic process	0	3.02	0
GO:0007626	locomotory behavior	0	0	0.53
GO:0032730	positive regulation of interleukin-1 alpha production	0	0	0.33
GO:0032732	positive regulation of interleukin-1 production	0	0	0.29
GO:0000082	G1/S transition of mitotic cell cycle	0	0	0.17
GO:0032650	regulation of interleukin-1 alpha production	0	0	0.15
GO:0032652	regulation of interleukin-1 production	0	0	0.13
GO:0044843	cell cycle G1/S phase transition	0	0	0.12
GO:0006471	protein ADP-ribosylation	0	0	0.09
GO:0048477	oogenesis	0	0	0.04

## Sheet: TAZ-specific genes
AC087521.2
RBBP5
HIGD2A
EIF2D
MTERF4
B4GALT7
AC006538.2
OPA1
ECHDC1
OTUD7B
C17orf75
MARK4
WDR11
PRSS27
AC115989.1
EME2
TIMM29
INTS5
CARD8
AC090559.1
YJU2
TOGARAM2
VPS16
MED18
GALK2
EEFSEC
AL050349.1
PLD4
ACBD6
PSTK
TPI1P2
GRPEL2
ANKRD40
MRPL51
ATP6V1G2
MIR636
PRPF18
SELENOH
CFAP298
RAB18
AC073878.1
MRPL21
VPS13B
NUP107
DIAPH1
RTEL1
MBTPS2
BLOC1S6
C11orf49
NME3
MRPL30
SUPT7L
PARP11
IGHMBP2
AL136295.4
LRRC49
AC004148.1
RNU2
HINT2
COQ4
C18orf63
TYW1
ADAP2
PCED1A
AF131216.4
GEMIN7
CENPP
LINC01547
AC012313.9
PSD
RAG2
AL591684.2
NUP153
AL031665.2
AC131025.3
C18orf21
MIR6847
GIN1
KRR1
MRPS31
NUDT5
NFIC
EIF4E2
ATP13A4
AL121944.1
MPHOSPH10
ZNF341
SLC25A53
ZDHHC6
ATP5PF
COPS4
TMEM69
LIG4
KIF18A
MPDU1
STPG3
AL162171.2
RNU7
UQCC1
FBXO28
AC132872.2
MITD1
ZC3HC1
C10orf88
AC010642.2
SLC35A3
AURKAIP1
TARS2
ATPAF1
NR1H2
CDC16
DHX33
STMP1
COX16
PIGL
STARD3
AC104472.3
LINC00476
DCDC1
GPBP1L1
SRP19
MRPS22
AC092117.2
DTWD1
NAA20
COQ3
DNAJC2
KCTD10
C11orf74
MAF1
ZNF837
CPSF1
MRPL44
ISY1
NOP16
AL133523.1
AC025271.4
AC090061.1
LINC01836
AL592435.1
TRMU
RBM28
CSNK1E
AC093677.2
CPPED1
TYW1B
AP002990.1
TMEM101
AL390955.2
PSMG3
EXOSC4
LAS1L
RRNAD1
AL357140.2
TMEM222
HMGB1
NDUFS3
OOSP1P2
STX18
ZNF391
NORAD
SPAG8
RSPH3
AC107871.2
ZNF213
ZNF646
JMJD4
INTS12
MCAT
CCN2
AC074138.1
NFKBIL1
GTF2H4
AL138724.1
LTN1
YBEY
METTL6
ALKBH3
YY1
PDCD6
TDP2
GMEB2
Z83844.1
AC021087.1
ALDH3B1
RTTN
TNNC1
FAM98B
UBE3B
MTOR
MTHFD2L
STMN3
TOP3B
TTC26
MCM3AP
PUM3
STIM1
DPM3
NOL12
UBA5
WARS
CYREN
DNAJC25
CCDC106
AC133550.2
HEATR6
TMEM130
AL138966.2
AC112225.1
DDX55
AC141586.1
PEMT
CCNC
MRPL58
TACO1
ZNF596
ZKSCAN4
ZNF490
SMG8
MED23
PPIP5K2
MEIG1
MLEC
PDCD2
AL590326.1
ZNF561
VARS2
ADPRHL1
PLEKHM3
AC091060.1
AC233992.3
EHBP1
NSL1
SBDSP1
RF00019.797
AC090527.3
THEM4
VPS51
AL050341.2
ZNF205
AC005578.1
GORASP2
TMEM41A
GTPBP3
LZIC
SLC4A1AP
MTMR9
ANAPC5
USP30
GALNT4
ALDH3A2
FAM227B
IPPK
SHARPIN
AL133500.1
SMUG1
RNA5SP221
ZMPSTE24
RNF185
NDUFC2
MAN2C1
VPS9D1
SUGCT
AP002761.3
BANP
TSPAN10
SMG7
NSUN4
EXD2
BORCS8
RPL23AP53
OGFOD2
ST13P21
ISG20L2
SSBP1
GFM2
FBXW11
RPL39P5
POLR3B
AP002748.4
REXO4
NUP54
NMNAT1
MFAP3
RPS7
AL162171.1
AC005736.1
MRPS34
ZNF581
AC011462.6
FBXW8
GUCD1
WDR83
POLDIP2
GLUD1P2
TRIP4
AAR2
MAIP1
MALSU1
SNORD54
SEC11A
METTL9
AC006273.1
AC048351.1
NOL8
DPY19L4
IPO4
USPL1
RNU6
AC068338.2
GTF3C3
POC1B
TXNDC9
AC108134.4
AC003070.2
RUVBL1
DPAGT1
RF02125.1
AC024451.2
ZSCAN12
WEE2
KIAA0586
MIR5001
UFC1
FBXO22
NVL
SBDS
ZBTB11
ADAT2
ZNF579
FAM228B
AL035530.2
MTBP
NELFB
SLC39A13
COPS7B
NCAPD2
DSTYK
AC118553.2
PSMC2
ANKRD2
TVP23B
TMEM129
TYW5
NME1
POLR2L
AC022400.5
CCDC97
AQR
STX16
PSMF1
DUS1L
UTP3
AC020558.1
BMS1P4
ZSCAN22
MKRN2
KCTD5
MRPL40
ALG3
TATDN3
ZNF569
SF3B6
KNSTRN
ZNF616
AL355472.3
NDUFAF4P1
WDR34
LINC01186
KF459542.1
NPLOC4
AL590644.1
EDC4
RNU6ATAC
PEX13
YIPF2
AC008781.1
GABPA
TBC1D19
ABCB9
SLC39A3
NKAPD1
ZNF549
ALG10B
MTIF2
MRPL16
TEX9
ZNF791
C3orf38
CCAR2
AC083862.2
MIR554
AC008572.1
SNRNP200
ST13P19
PDHB
NSA2
PCID2
SEC16B
TOR1AIP1
ZNF461
CDK5RAP1
KBTBD4
JPX
BANF1
RERGL
ZNF770
TMEM128
ZSCAN9
DRG2
DNAJC24
PIK3C2A
CNBD2
GSTCD
MNAT1
AC016876.1
CCDC80
AC022400.3
HEMK1
PRRG2
TMEM199
SNRNP27
VEPH1
ZNF580
CDC123
SENP1
ACAD11
PFKM
KYAT1
MIR3928
FAM207A
AC244033.2
NDUFS7
SNAP47
PCLAF
TBC1D13
FRY
SLC27A5
HELQ
WDR31
AC099661.1
TUT1
TIMM9
AL441992.2
GTF3C5
MHENCR
AC090527.2
SCAND1
TMA16
ACOT13
MRPL48
BBS1
HDAC8
GGT1
AC025048.4
INTS14
FANCM
ZSCAN16
ACSF3
PEX3
PHKA2
RPS20
EXOSC3
C3orf18
SRSF2
AP3S2
AC027288.1
VPS52
AC002094.1
RGS5
LRRC37A5P
ZNF408
EFCAB7
FAM114A2
SNRPD3
AC006262.1
JRK
TXN2
ZNF619P1
NIPSNAP2
TEDC1
HIRA
TSPAN4
RPL29
EMC4
WDR24
MTR
AF131216.2
C8orf33
FRA10AC1
TRUB2
AGK
PHB2
NUDCD3
PCYT1A
HMGXB3
ERI1
EAF1
BRF2
EIF5B
GOLGA3
ARL6IP4
VPS25
AL358933.1
AC004908.2
LSM5
DPP9
CLPTM1L
KIF22
LMAN2
PTPRM
NDUFA12
PIH1D2
EIF3F
ZBTB45
RNF6
EXD3
NKAP
NENFP1
TRDMT1
SLC24A1
TIGD6
TEX38
CUL4A
MRPS31P4
NUF2
MFSD11
RAP2C
TNPO3
RPL37
AC118553.1
AC013468.1
NEU3
WDR83OS
ZNF668
SEC22B
NDUFB3
VAC14
HUS1
TMEM68
DUSP8P5
BMS1P2
COMMD2
SAR1B
MRPS31P5
TSEN15
DMAP1
SH2B1
DCP1A
BMS1
MCEE
WDR25
Z92544.2
RHOXF1P3
THAP10
SLC33A1
NDUFAF1
AC010422.7
ERCC6L2
SREK1IP1
LRRC8A
METTL15
TUBGCP3
FEM1B
MRPL39
LSG1
RPS18
PATJ
AC109322.1
NOSIP
CSTF2T
ZNF570
BMS1P1
STOML2
ZNF669
RRP15
PSCA
NXT2
MRPS18C
TACC3
VPS45
AL133346.1
C2CD2L
FKBP3
C12orf73
PPIL3
MRPL3
AC068234.2
ARHGEF17
KLHL20
AL353708.3
SF3A3
ITGB3BP
NSFL1C
EEF1AKMT4
NCOR1
MRPL1
FBXL15
EMG1
DCAF10
TEFM
CCDC57
NR1H3
COPS2
AC124861.1
ENPP3
SASH1
ZNF562
AC026362.1
EIF1AD
ZNF846
ZER1
PPIL1
NOXA1
NIF3L1
MRPL13
AP001931.1
SEC13
AC110795.1
C8orf58
FAM126B
TIGD1
RF02124.1
PDE6D
ALG10
ZNF276
ZNF623
MTRF1
INO80B
NKAPP1
AL359317.2
OSGEPL1
CGGBP1
NIPBL
MPLKIP
RFXANK
AL035420.1
SDHAF3
SLC25A21
COA6
SLC44A1
ZNF165
C12orf76
CWC27
SNRPB
AC005842.1
VTI1A
VWA8
AHRR
DDX1
RPS29P16
TTC4
C21orf59
TMEM242
ARHGAP1
PSMD11
AC010422.5
CERNA3
WDR36
AC104986.2
MUCL3
AC005899.8
GLUD1P3
TGS1
CHCHD2
ABHD13
PUS10
ACP2

## Sheet: YAP-specific genes
AC034102.3
TOB2
GFI1B
HEXIM1
AC090517.5
CYP51A1
ZNF821
ATF4
AC090517.4
KMT2D
RNF187
AC145285.6
AC138150.1
AC098934.4
KMT5B
ATF5
UBE2B
ARHGEF12
AL136172.1
PCAT6
HMG20A
HEXIM2
TRIP12
AC073283.3
ZKSCAN2
UBB
PAFAH2
CALM2
CCNI
NUP62
AL139288.1
AC145285.3
AC144522.1
KCTD9
IZUMO4
MIR5188
COL4A6
COL4A5
GABPB1
ZNF540
AC024475.4
ZC3H6
PTEN
AC093484.3
C19orf48
CDCA2
TCF12
AC112907.3
CDC42SE1
RBL1
RCOR1
ZWILCH
ATAD2
TEF
RCOR3
ZNF571
ADNP
MIR548AW
SNORD18A
EIF4A2
CDKL3
SNRNP70
GNB2
FBXO36
CCDC88A
OGT
CCNG2
HOXC9
ATXN2L
ZNF335
KDM5B
ZNF518A
FOXJ3
TCF3
SNORD2
GABARAP
AC104109.4
ZFAT
KLLN
MOB3A
RPS26
PLD6
KDM5C
AC120057.2
BRWD1
TSC1
GABPB2
CTDNEP1
PHIP
AC142472.1
PPP1CC
SOD2
SPRED1
MEF2A
CFAP20
CTNNB1
HSP90AB1
CALM1
HOXC
AC009107.2
PEAK1
PHF21A
RPL4
UBC
IST1
AC120057.3
MTF2
WTAP
PKM
IL4I1

## Sheet: YAPTAZ shared genes
ANAPC16
AC078962.3
PUM1
ARHGEF17
MEIS1
HEXB
LCN12
MTCO1P12
PHLDA1
LINC01861
LINC01078
C10orf143
AC010327.4
RF00019.46
SBNO2
MIR7848
ZFAT
AL355102.4
TGM5
MCM7
FAM198B
MIR5689
TMEM184B
Z97205.1
LINC02098
MGAT4A
LAMA2
AL158800.1
IL24
DOK7
DPAGT1
SERTAD2
LY6K
SIRT4
STAT3
PPP1R13L
DDX60L
TSPAN2
PANX1
ANP32A
TRIM6
OASL
POLA2
JPX
PARP10
LRRFIP2
LURAP1L
AC013270.1
ATP5MGP3
DAPK3
MIA2
MT1CP
SERPINB7
RAD51B
ST13P12
AC018781.1
PIWIL2
AKNA
PKM
APBB2
LINC01119
BCAP29
RIMKLB
CLDN10
LMNA
AC124068.2
NRDC
KIAA0586
GSPT1
CUL2
DGKZ
ATP1A2
DNAJC7
SEPT9
CCDC121
LINC02380
ANK1
PLXNB2
AC126118.1
ATP6V1C2
ZNF7
PKD1L2
AC107214.1
AL451164.1
MBD6
MIR30A
CCNB1IP1P1
SLC44A3
PTPN2
ART4
Z94057.1
CAMK2G
SLC46A3
GRXCR2
SERPINB11
CPEB4
TFEB
FOLR3
NIPAL3
RF00019.390
RPS20P31
B3GALNT2
LRRC2
AC006023.1
KANSL3
SSX2IP
LINC02590
SERPINA3
WSB2
SLC12A4
MICALL1
SLFN12
SLC7A11
SMIM14
AP3M2
PTPN12
KTN1
KMT2D
LINC02236
WDPCP
CCK
MYO1C
TAS2R14
SPEG
CCDC34P1
RNA5SP531
ELP4
STPG1
CASP1
HMGB1
HTR1D
WASF2
AC099541.1
PDYN
IRF6
DPP9
FADS3
RAB11FIP3
AC124276.1
KANK2
AC011462.1
KIR3DP1
AL357033.4
RF00017.166
BCL9
DHX30
C8orf86
DCP1A
CLN6
AC138356.1
TMC1
WWP2
TMEM139
IL16
ANGPTL4
AC015726.2
IL1RAP
INHBA
LINC01549
RF01210.28
CCAT2
TYW1
AC117383.1
AL590004.3
TXN2
BNC2
CYP27A1
GOLGA4
PAX8
CD200R1L
TCTEX1D4
AC040162.2
ARL16
ST6GALNAC1
AC110992.1
BAG2
RNF130
BCL2A1
SPECC1
IFNGR2
FGFRL1
CHRNA9
PPP3CA
GTF2B
KIAA0753
AC025043.1
CHN2
DPYSL3
RBM10
AL133215.2
MIR3936
AL606517.2
HIRA
LINC01534
RNF44
TRIML2
SYNE2
SLC38A6
AL590552.1
DISP1
AL731556.2
AL359692.1
BATF3
AC016586.1
RMRP
DHODH
AC004471.1
AC002378.1
CARD16
LINC02362
ARHGEF2
MRPL13
NUDCD3
REPS1
AGPS
DERL1
FHAD1
TK2
PPP1R3G
AC090109.1
AC018529.2
TMEM205
MIR4451
SLC9C1
CCDC26
RPL35
ADK
EGR2
AC145423.3
CFAP298
LINC01132
GPN3
AC073592.10
PRR14L
AC104109.4
AC090579.1
EHD2
RNVU1
C2orf49
LINC02595
RIC8A
MED20
FOXK2
NLRP2
AC022509.4
AP2S1
DCBLD1
AC005264.1
LINC01093
NCBP1
PIK3C2A
AL138902.1
KHDRBS1
UXS1
BCAM
HDAC2
ERAP1
AC103740.1
RF00019.142
AL138726.1
COL4A2
ZNF133
NEAT1
AC007136.1
AC106038.2
SGMS2
VPS36
AC007950.3
CCHCR1
AKAP6
KATNBL1P3
SLC16A5
AGAP3
AC090589.1
TSPAN4
STAC
BTBD10
FAM49B
ANXA6
RN7SL219P
AC007215.1
AP001476.3
AC098935.1
CFAP54
AC007569.1
MPDU1
AC009120.5
SH3TC1
SEMA5A
RF01955.1
AC023024.1
MDM4
PPP5C
LGALSL
ZBTB47
THG1L
AC006435.5
ZNF620
SGPL1
AC019117.1
RPL29P30
ACOT7
NANOS3
ZNF546
MIR181A1HG
TUBB6
PAM
MIR5572
KRT17
AF064858.1
PLB1
NME7
AL358472.4
SLC49A4
MRPL22
LINC01485
FLOT1
CNNM4
AL589666.2
DGCR2
AC148477.4
HIGD1AP13
NSMCE1
AD000813.1
MSLN
AP004609.2
AL355377.1
NDE1
WIPF1
AGTPBP1
UBE2F
LINC01136
ARID1B
HLA
PEA15
AC097625.2
FLG
AL158168.1
CLASP2
NEURL1
ITPKC
PBX1
ZNF83
AC005699.1
UBASH3B
GNAI2
AL450304.1
XPNPEP1
AC131011.1
KLF7
RNF139
PLOD2
GNAI1
LINC02004
GALNT9
SPTY2D1OS
WTIP
CCL20
ZNF300
AL133444.1
RUNX1
NUCB2
PTPA
PPAT
AC092066.1
STIM1
MTHFD2L
AC114546.4
HSPB3
SURF6
AQP5
LINC00563
PLEKHH3
SERPINB2
AL157834.2
IL4
GULP1
PRSS36
TXNRD2
AC026726.1
AL135934.1
AP002957.1
LINC01589
AC069281.1
RABIF
AC009806.1
MIR4663
TSNAX
FERMT2
TYW1B
SNX8
ALDOA
NOTCH2
NRG2
AL162274.3
PTGS2
WDR81
NAPA
RNF152
AC091959.1
AC245041.2
SYTL2
AC105935.2
PRICKLE2
MIR584
AC067930.4
DDB2
AOX3P
PPP1R1C
DIS3L2
AC009509.2
MAPKAPK3
FBXO33
AL162724.2
AP005264.7
AC040904.1
AC012370.2
NR1D1
LINC02473
EPHA2
ATXN10
PALMD
PMEPA1
LINC01220
SLFN5
NRP1
CEP350
LINC00431
RBMS2
RPL39P5
AC079336.5
BCR
LIAS
CHD9
CCDC192
LINC01389
AF001550.2
KRT80
LINC00857
NPC1
ZNF672
SYNGR4
IL18
CFB
ACACB
AL392172.1
MIR4423
TBC1D9
AC007405.1
HMMR
HBP1
AC105206.1
IPPK
PXT1
NECAB2
AC020978.4
ILF3
RBMX2P4
ANKS6
AC109583.1
ADM
CAPN2
BDP1
AC026191.1
BIRC6
AL158207.1
BAALC
ABHD14B
POC1A
SUPT5H
AC087623.3
AC019080.1
ADIRF
POLG
ADCY9
CA12
LINC02185
LINC02343
AL355075.5
SNORD68
LINC01255
AC009623.1
2021-03-10
AC005703.1
FAM120B
GUCA2A
EIF4G3
LCA5
SLC11A2
TLE6
C9orf43
AL133410.1
SLC45A4
FANCC
DLST
AC091962.1
AC006064.6
BPIFC
EEF1DP5
AL136985.1
KRTAP2
KCNAB2
RNY1P10
AC241644.3
HIST2H2AB
YBX2
ADTRP
LINC01127
FGFR1
AL121760.1
BSCL2
IL1R1
HDAC7
SLA
FGD4
AC003958.2
CIDECP1
RFPL1S
GPR39
MAT2B
NPW
SH3TC2
CARD19
LINC01357
AC073530.1
LINC02352
LINC01828
AL353803.4
TMEM265
C12orf4
IL19
ATP5MD
AC008147.3
FNDC7
TOMM70
AP003419.1
PXN
CASC10
PDE12
AC011383.1
BLVRA
RF00012.38
AC022028.2
RALBP1
COL5A3
AC027290.2
BDKRB1
QKI
FAM87A
NCDN
DDC
C21orf59
RN7SKP114
MECR
AC008133.1
MAFK
AC079598.3
AP006248.1
ABCB11
A4GALT
CDKL2
AL451069.1
ABCB9
AC090774.1
NATD1
ADGRE4P
NCOA3
C11orf86
AC080129.1
AC091435.2
GSAP
XDH
DIS3L
C17orf51
FOCAD
RGMB
CLEC5A
KIF1B
CASZ1
RAB11FIP5
RNF212
RF00019.347
SNX12
SYCE1L
CRYGC
AC092140.1
PUF60
AC121761.2
E2F7
ALDH1A2
AC007551.2
HNRNPA2B1
ANTXRL
AC116353.1
ADGRA3
LYSMD1
SGCE
USP31
PTPRE
INPP5K
ERCC3
AC012456.2
LGALS7
AL023754.1
AC087392.1
SYTL3
AC011726.3
P2RY13
VWA8
ZNF570
PXDN
LINC02613
LINC01206
GPR137
AC093152.1
SERPINB9P1
AP001442.1
TBK1
AC079760.1
MTCP1
TMPRSS3
AL353680.1
SERTAD1
CHD8
AL590004.2
AL353653.1
LDB2
BTG4P1
RNF187
AL451062.3
SSR3
NPM1P18
SLC19A2
CHEK2
ANXA3
LINC01291
CD160
CCDC190
AL353622.1
THOC6
DACT2
AC008875.1
LRRC20
CDCA7L
B4GALT1
LINC01108
RF02124.1
HHIPL2
ASB1
SIRPB2
DUSP3
AC093278.2
CUEDC1
AC087385.3
RFC1
LSMEM1
UBLCP1
AC121338.1
VN1R69P
AL078601.2
C1QTNF2
SENP8
AC012065.1
AC090692.3
AC087897.2
AC010761.3
LINC01151
LINC01845
MAD2L1BP
TES
ZFPM2
KLF5
RF00003.41
YWHAG
RPL7P30
KDF1
MS4A4A
HMCN1
TIGD2
AC025031.1
FMO1
CD82
AC144450.1
CRYM
CAAP1
AC090970.2
AL358790.1
AC073575.2
MIR100HG
AL445524.1
TGM1
SERTAD3
CLEC2B
AC019197.1
MAEA
2021-03-06
DAGLB
AL158042.1
NF2
ODC1
LINC02599
FLOT2
MIR591
STAU2
MUCL3
EXOC4
MIR1288
PUS7
CPA4
CATSPERD
COCH
ANKUB1
AC093277.1
AC234582.1
KIF23
DHRS9
AC021594.2
FBN2
LINC02303
AL133153.2
AC068234.3
BAHCC1
NPLOC4
CLCA4
TM4SF1
RSPH3
FBN3
VEPH1
AC097065.2
AL160408.2
TMOD3
GTF2H1
TRAPPC12
EPS8L1
AC073359.1
RHOBTB3
C17orf64
AP005899.1
BMS1P4
MIR22HG
THBS1
PTCD1
AL135905.2
PTK2
AL359715.4
FAM111A
SLC48A1
AC008629.1
REV3L
AXL
MIDN
ERP29
MIR6090
ZSCAN31
MTCO2P12
APOBEC3B
AC012640.3
CDK5RAP2
CYBRD1
DMXL2
ZBTB17
ZNF598
ST6GALNAC3
AC008649.2
JRK
USP43
AC009226.1
PPP1CC
COPG1
PSORS1C1
LINC02518
KMT2E
CNOT8
AC078993.1
HNRNPA1
AC010335.1
AL109935.1
TGFBI
CASC15
NUS1P1
TMF1
AC069366.1
AP005902.2
COBLL1
SLC7A6
PLEKHB2
SUB1
RCC2
SLPI
ZNF395
MMP28
GLUD1P4
AC008083.1
FEZ2
AC068631.1
BX539320.1
AC090833.1
LEMD2
CCDC9B
DNAJC17
SSH1
AC145207.2
CCDC18
TCF7L2
ZNF497
MIR6887
RNA5SP473
AL450992.1
ST3GAL1
AJUBA
LINC01731
AL606519.1
PIK3C2B
PTGER4
HSPA4L
DBIP1
SH2D3A
PAFAH2
AC007163.1
PPP1R15A
ENC1
ADGRF4
RBFOX2
NUAK2
CD55
AP2M1
AL592164.2
TM2D3
DLGAP1
CCDC159
AC097504.2
LINC01356
AC007029.1
SBDSP1
AC002076.2
RN7SKP73
AL133153.1
AL352979.1
EYS
NUDCD2
C1orf159
AL355607.2
DLX4
CLEC19A
CACNA1C
AC011195.2
PPP1R18
AP002478.1
TTC7B
SLC39A12
AC025271.4
RF00017.135
AC073592.1
SCAT8
PRIM2
MST1P2
RN7SL265P
ARHGAP17
WEE1
MGAT1
AL139288.1
AC103843.1
RAD54B
AC011944.2
ZNF530
AC073130.3
CLDN12
MGLL
GNG5
AC087893.1
ZNF860
NUP98
SNCAIP
HIST1H3B
ADAMTSL5
URGCP
SEL1L3
AL157896.1
FGF1
MICU1
MED17
RAB24
ACTA2
LINC02214
DEGS1
PDK2
FOXP1
NEMF
EBAG9
NPTN
MTCO3P12
AC092119.2
DDAH1
LINC01909
SLC29A3
AC099344.2
LOX
IDH3A
JUN
AMACR
REELD1
ZMYND8
SFTA1P
AC018767.1
AZIN1
PLEC
ATF6B
EMC6
MIR4492
MRPS21P9
AC004231.3
AC103591.3
AL592486.1
MCFD2
IFNGR1
RNU6ATAC
CYB5A
AC069360.1
AC084759.3
CCNC
AL139161.2
AC093663.2
AC008443.1
AL592071.1
TTF2
ADAMTSL4
ADORA1
CLDN6
SLC41A3
ANKRD1
DTX4
ALDH3B1
FLNA
C9orf3
DYRK3
SNORC
IFT20
AC012640.4
MYEOV
HPX
ITSN1
EHD1
RN7SKP16
LINC01778
AL359834.1
HSF2
CHP1
KRT38
STARD4
GLB1
AC134043.1
AL049548.1
SHBG
C1orf112
EXTL2P1
CEP112
S100A10
TP53BP2
AP000864.1
FAF2
METAP1D
FAM104A
AFAP1
PRKCH
SAMSN1
LINC01944
DUSP14
SEPT11
AC104971.1
PDZK1
AC069454.1
AC116351.2
RF00019.261
AL021153.1
AC098650.1
P4HA2
TOM1L1
CTDSP2
AC093512.1
KRT8P12
JARID2
AL139393.1
NUP205
RF02125.1
TRMT5
FCRL4
BRCA1
C19orf33
DNAH11
RND3
AC048344.4
SEC11A
MICB
ANAPC4
PCTP
RIOK3
FILIP1
CNTNAP2
AC007493.1
LINC01823
SCARNA9
LRRC77P
ABCA5
SCAF1
PSMC1P9
CYP39A1
HMG20A
S100A4
UBE2Q1
AC021752.1
HIST1H3C
AL136982.7
ABLIM1
MIR3939
AC084757.1
AF111167.2
TMEM192
VPS13D
PRR11
DOCK9
XBP1
SLC24A1
PARL
SEH1L
AC011472.2
H6PD
ARHGAP8
LRIG3
ILK
SCUBE2
WDR13
AC079630.1
NUP188
GREB1
PLS3
SERPINB8
PRKCI
NUP50
MIR30B
NEK7
AL451074.3
VSIR
AL356599.1
CNST
AL078645.1
RAD9A
MYO1D
AC107926.1
ASPDH
AP005329.3
HSD17B3
MNT
AC016876.1
MTRNR2L3
TRAF3IP2
AL161431.1
SPOP
RF00561.8
HDGF
LINC02606
RF00015.7
MRVI1
AC067931.2
MRPS23
AC005050.3
RNU6
UBE2D2
CLCF1
ITPR2
CDH3
TUT7
AC010343.2
AC106786.2
SMIM33
NIM1K
TNRC18
FRMD4A
DUSP4
AL713965.1
HSD17B12
TAF1A
AC006333.2
SCN2B
MVK
RN7SKP192
MIR3926
AL157911.1
FIBIN
CLIC4
RPS14
AC104461.1
ZNF687
CIRBP
DMPK
TRIM35
RPL7L1P8
AC006273.1
WDR7
XIRP2
CDC40
AC096861.1
EIF4A2
SNORD2
PALLD
ZNF837
AC105429.2
INHBE
AP000904.1
LINC01465
AC106886.2
RF01210.22
MIR6737
MAML3
AC104126.1
LACTB2
AC119676.1
PPP5D1
MYH9
C2
LINC00922
RNF167
AC226119.1
AC080023.1
AC012488.2
AC025419.1
PPP6R1
SMG7
WASF1
MFAP1
AC004687.2
PKP4
SH3D19
AL583859.2
MMP19
C12orf80
ZNF611
AC005355.1
AL033527.5
PNRC2
PCNX4
RPS3AP42
AC091271.1
LPIN2
BZW1
PAICS
PHLDB2
CD14
DNAJA1
ZNF784
RF00019.471
TMEM138
AC087257.2
CD46
DRAIC
COPS8
AL121655.1
DDA1
AL022724.1
STK17A
COL28A1
ADAMTS3
IL6R
C18orf63
AP001043.1
ZNF569
TFDP2
MRPS15P1
SLC9B1
SPINK13
AC068228.1
RPL17P36
CALHM5
NAB2
GYPC
AC105105.2
AL355297.1
TGS1
FOXO3
RN7SKP11
AC015819.2
SS18
AC034223.1
CCDC102B
AL035691.1
DHX9
AC119674.1
HSPBAP1
MXRA8
AL049869.4
ABCG1
LAT2
AC000078.1
RRM2
AC124861.1
AL133330.1
RDH13
RTN4
AC091820.2
AC022001.1
ATP5MF
MIR942
ITPRIP
DDIT4
SLC7A2
ST18
LINC01588
AC036214.1
POMT2
PNPLA3
XPO6
CAMK1G
SCNN1A
OVCH2
TG
PQLC3
PAWR
AC083843.2
AL139246.4
RNF19A
NUCKS1
LINC00968
LINC01010
PIK3R1
AC105277.1
AC092123.1
OMG
RAPGEF2
LINC01359
MOB3A
AC034243.1
HIST2H2AA3
CHD1L
PMEL
AC007906.2
AC005523.1
ING2
ATG13
CRTAC1
LINC00706
HSPA5
AC013472.2
AL441963.1
ACTN1
TRNAU1AP
RPS29P27
RNF39
CARS2
CTH
GRHPR
LINC02521
AC117422.1
AC027281.1
AL356310.1
FER
PMVK
LINC02015
ATF3
OSMR
RIC8B
TGM2
AP000897.1
SMAD3
BAIAP2L1
AC027026.1
LINC00346
RPS12P17
AL034376.2
PHLDB1
SLC16A7
RAB43
MIR4472
AL732414.1
BRD4
AL121885.1
TOB2
NR4A3
ITGBL1
AL358075.2
LRP6
CCNI
B3GNT5
QDPR
CDC42EP4
ETV4
AC104564.1
TCTN3
SAT2
MTF2
TNFSF9
ALS2CL
NUP58
UEVLD
MRPL45P2
TBC1D22A
AC021766.1
CYP1B1
ALK
AC019080.5
AC007422.1
IER3
RAPGEF3
SIX5
ADI1P1
PXK
ABCA6
ZSCAN9
RPS27AP6
RN7SKP110
PLA2R1
AC116348.3
CCDC61
SSTR5
ABCB8
MIR6732
ZNF702P
RXRA
IFT122
DDX24
AC069209.2
RPL7P4
IRF2BPL
CADM3
CMTR1
CDC42BPG
SLC8A3
AL138828.1
TECR
AC108751.3
ADCY7
PNPLA2
SGPP1
GRHL2
TATDN3
AC007431.2
AF241726.2
AC137630.1
AC073592.2
LZTS3
LEMD1
ADAMTS6
UHRF1BP1L
LINC02065
AL138885.3
AL356277.3
RPL26P26
AC012306.1
AC009365.1
DYRK1A
TRIP10
ULK2
SLC1A5
AC021054.1
QRICH1
GADD45A
AC126696.3
NAV2
TMEM245
ETV5
PODNL1
FAR1
AC112487.1
MLEC
CCDC3
PPIAP81
CDRT4
NEIL3
APBA3
AP005264.1
EGFR
RN7SL700P
TEX45
Z99943.1
GCNT2
ST13P19
LINC00476
KCTD3
AC091959.2
AC104695.2
AL121890.5
HNRNPA3P4
AC087521.3
BIN1
FBXW7
FAP
SFSWAP
SPATC1L
ELL
ASXL1
AL139220.2
AP000553.8
SLC7A7
TNFRSF10B
HEATR5A
AC135050.5
MIR3197
ZMYM4
CSDE1
COX7A2
SLC25A38P1
TMBIM1
PSCA
ISYNA1
OCLN
SFN
IL31RA
RNASE7
TPD52L2
ZNF76
SLC39A13
ACOT2
AC009248.1
AC100822.1
LAMA1
EIF2AK4
TSTD2
AC034245.1
NXNL2
BCAT2
GCHFR
AL391832.2
NVL
AC012506.4
AL357992.1
TRIP13
LINC01920
LAMA3
FAS
SLC22A15
MIR92B
SERPINB13
AC092078.2
RNA5SP40
AC010609.1
ZNF438
RF00019.83
NR4A1
YY1
PSEN1
SSR1
AC135050.4
AL627422.2
RNF145
AC008592.1
AL138878.1
KIAA0895
DERA
FAM184A
GLIPR1
MIRLET7BHG
FNBP4
SRA1
PDZD2
PFKFB3
CTSC
PHLPP2
AC007686.3
AC007638.2
NOCT
MINDY4
RN7SL198P
ITGA5
AL591644.1
ARMCX5
AMOTL2
TMSB10
MCCC1
LITAF
AC007655.1
ADAMTS7
AP001468.1
PKP3
AC116407.1
OOSP1P1
SLC27A1
SHTN1
MCC
DTNA
C3orf18
AL357556.4
AL591885.1
AP001208.2
AL121987.1
PAPPA
EXT2
PVT1
RIN3
GABRE
CHST11
AC008662.1
IL5
ARFIP1
LINP1
GINS1
AP003419.3
AC008781.2
FBLN5
RNA5SP442
LARP1
ELP3
NKIRAS2
KDM4C
FBXO31
AC122718.2
CTNNAL1
FAM216A
GCC2
KLHL40
CREB3L2
AC002401.4
PSMG3
TJAP1
KIF20A
AC093732.2
PEX13
MARF1
EPHA10
CNGB1
KCNQ1
AL591806.2
IFITM9P
ADGRE5
SPAAR
AC011890.1
LINC01443
ARPP19
MRI1
AL596442.2
IL4R
KIAA0319L
CISH
MIR4669
RNA5SP282
TAX1BP3
AP001596.1
LINC01394
AC006482.1
NFKB1
MALT1
AC091959.3
PRLR
SRI
NECTIN4
AL109924.5
AL354710.2
STX18
HCG20
LINC00963
RNA5SP160
ENKUR
POLQ
FGL1
TOMM20
AL391361.2
FZD7
CIDEA
GOLGA8J
CCDC63
CPA5
GIMAP5
RF01210.6
EMC3
TBC1D4
MAPKBP1
RPS2P6
RBM12
AC104777.2
SLC20A2
MPDZ
SEMA4B
SLC6A6
ATP13A3
RPL35AP21
AC010646.1
AL031726.1
AC073072.1
IFT74
TLN2
TMEM198
FTL
RPL31P44
C8orf58
ENAH
CPE
AC007950.1
ADAMTSL1
AL133464.1
CSGALNACT1
TRAM1
AC130456.4
KISS1
SERTAD4
DIO2
AC097460.1
SLC2A1
MAPK10
KIAA1755
EHBP1
RF00019.178
COL16A1
AL353651.2
RF00493.2
G0S2
LINC00609
SLC26A2
TEX12
AURKAP2
RERGL
RHOBTB2
AC093425.1
LINC02454
AC024145.1
COQ8B
KLHL33
SNORA10B
AC108925.1
COG7
PLEKHG4
KDM4A
KLHDC8A
B4GALT4
DNAJB5
AP000439.1
RIN1
SHC1
ERGIC1
SRFBP1
LINC02298
AC011468.5
PSME4
MBNL2
AC068282.1
NR1D2
ZCWPW2
TRIO
KCTD11
AC244090.2
FUK
GNB5
POLR2B
AC007179.2
ARL6IP5
EMP3
LHX4
BTG2
GRN
RPS2P52
GSG1
COG2
VSX1
LINC00511
TRPM8
MIR181A2HG
TM4SF20
ROR2
AC126696.1
AC010542.3
AC105206.3
ZNF23
MTMR7
GASAL1
AL355916.1
LINC02246
CLASP1
BCKDHA
FGD6
ZBED2
LINC01303
COL11A1
AL359710.1
NUP37
NUF2
F8
LINC00592
PCYT1A
USP40
COQ8A
CDC42EP3
RF00012.32
TTC1
TMEM209
TRAPPC9
PRR7
RALGPS1
KNTC1
VPS41
UBE2B
GON4L
TPRG1
RF00019.275
MFSD2B
AC104211.1
RNU4
ABCF2
NDUFAF2
UBE2L6
UHRF1
ZFR
RPSAP52
AC090192.2
DSTN
MREG
SNORD95
AC008966.3
MTBP
AL359541.1
DNM1L
VDR
P3H2
AC090617.5
AC003070.2
AC104063.1
FKBP5
RNA5SP75
SOWAHC
BOLA1
C17orf49
LRRC6
STK40
NKAPD1
AC092944.1
AC022146.1
TRIOBP
CDK2
MCTP1
AL121574.1
ZNF341
ZNF678
GBE1
AC010420.1
SLC17A3
PFKP
SF3B3
ATAD2
CPQ
COASY
RNF207
AC004448.2
TBC1D19
ATG16L1
HSD11B1
RPS23P10
AP003097.1
HCFC1R1
CSTA
LINC00499
AC106739.1
ITGB5
DAB2
PPP1R21
SCAT2
TRAPPC3L
BX322234.1
TEX14
RHBDD2
CALM3
GXYLT2
FBXO46
AC008687.5
IL10RB
PRCD
RUBCN
PIP5K1A
LINC01564
AC092535.3
LINC02617
AF013593.1
RPL24
RF02271.37
DAG1
KANSL1
KAZALD1
AP002884.1
LINC01118
AC098487.1
LINC00466
FUNDC2
STK32C
HADH
N4BP2
AC008641.1
OVCA2
ELOVL3
AC005746.3
RF00554.8
MED28P7
KRT15
AC008406.3
AC107959.3
MDH1
AC113143.1
AP001109.1
HIST2H2BD
GYS1
AL731532.2
NFXL1
CCDC62
KLHL12
KLF10
LINC02603
GPR1
RAB3D
LINC01751
RPL4P6
TMEM75
KMT5C
PISD
FTLP10
PPFIBP1
AL035530.2
RPS27
NUP133
RF00019.285
LINC01505
MAML1
FO393418.1
UBE2J2
AL365436.1
EIF2S1
NOX5
MTMR4
AC097359.2
LAMC2
ARID3B
MUSK
OSBPL10
AL731577.2
PPP1R15B
CHML
SPRR1B
P4HTM
TMPRSS4
HIST1H4H
ATP23
NXN
MITF
AL032821.1
AC022784.1
DGLUCY
ZBTB8A
AC127522.1
ING1
DDX59
GPR137B
RNU5A
SLC39A10
WDR12
LINC01914
LINC00607
AC069209.1
TRAPPC3
JUNB
EEF2
MIR4309
LRBA
FBXL5
AC106865.1
SGPP2
ANXA11
TBC1D14
AC019130.1
SLC37A2
LINC00884
AL844908.2
NFX1
EMX2OS
AL591806.1
DNAH14
NAV3
AC022916.1
AP002008.2
2021-03-02
HTATSF1P2
AC080068.1
RF00561.4
ADGRF3
PCAT1
NEXN
AC129492.1
EID2
AL691482.1
AL162171.1
AC022400.5
AC007513.1
AC103740.2
CBX8
IGF2BP2
GRIP1
LYPD1
SAP30BP
WFDC3
ZFHX3
YBX3
AC005736.1
AVPI1
PPP1R9B
LTBP1
FGB
METTL18
CST9LP2
AC092167.1
OPN3
SNRPGP4
AC026954.3
TMEM95
CAVIN3
POLR3B
LINC01483
FAM9B
DUSP8
EVL
AL137003.2
UBAP2
EDEM2
UQCRH
RF01956.1
VGLL4
SMYD2
AL353719.1
AC010542.2
AC092142.1
GLI1
MIRLET7I
TIPRL
TENT5B
CIT
EXO1
RPS20P4
BCO2
ALG10B
EIF2B3
AC005609.3
SRD5A3
MIR676
PATL2
AC002550.1
ZDHHC7
SHE
GRHL3
TTC39C
LRRC28
AC010608.3
LINC00601
TRAF3IP3
AC128709.2
MEPE
COL6A3
GADD45B
APTX
UBE2WP1
PDCD1LG2
ELF3
AL132712.1
AL357146.1
RBM22
RAB30
AC011510.1
AC064805.1
SLCO3A1
PDCD6
CCNL1
AL596223.1
FSTL3
MTREX
NCR3LG1
EML2
AL365181.1
DTNB
AC108751.4
AF213884.3
WASHC5
CHD4
SCYGR1
AL162430.2
CEMIP2
LINC01686
SMAD1
SOCS2
COX7A2P1
CYCSP5
MIR3681HG
AC009302.1
CFH
BX323014.1
LINC01133
CRNDE
SLFN12L
KLHL5
SMAP2
AC005189.1
AF124730.1
RPS2P46
ATP6V0A2
AC021491.2
LINC01426
AC092068.2
LINC01503
ARHGAP26
KRT5
SCG5
FXYD5
[truncated: 2,178 more rows]
