# Supplementary material for: YAP and TAZ are transcriptional co-activators of AP-1 proteins and STAT3 during breast cellular transformation
Source: eLife journal article supplement (doi:10.7554/elife.67312), 2021-08-31
Supplement: supp [file elife-67312-supp-v1.zip › elife_poa_e67312_Supplementary_file_3.xlsx]

## Sheet: YAP-TAZ proximal
HHAT
SETD6
SLC1A5
PPP1R15A
CCDC47
ZNF800
EXOC4
CCDC148
FANCC
MTHFR
ST5
MYL12B
ANAPC4
PABPC1
COL4A2
ZNF7
NFE2L2
PPIC
SRPX2
SH3GL1
SMAD3
PPP1CC
TBC1D2B
ADCY7
GPR39
CYTH1
KTN1
PHLDA3
DUSP23
CLEC2B
FAM111A
RAB1A
GOLGA4
SLC8A1
H2AFY
NUAK1
FPGS
MYL12A
RRAS
SOX12
NBN
SHROOM2
ECH1
JDP2
RAB34
NBR1
ZDHHC7
FOXP1
UHRF1
GALNT10
PPP1R9B
DHRS4L2
CLEC14A
TRAF3IP2
KANK2
CREB3L2
CD160
SHE
MTMR4
MICA
RFFL
HM13
SMARCA2
FNBP4
CUL3
SLC4A1AP
ADCY3
SURF6
CDK2
EIF2AK4
SPEF2
ATP13A2
CCDC121
FER
LEKR1
B3GALNT2
VPS45
SEH1L
RNASEL
BCKDHB
RCHY1
AHCYL1
BRD2
HMG20A
NUP205
ZNF641
SS18
ABCG1
SESN1
ZNF581
TPRN
SETD4
CAST
PUS10
THG1L
WWC3
TMEM9
PEA15
ARL5B
SLC20A1
SYNE2
MREG
PRRG1
CCNL1
CALD1
SPINT1
SSH1
SIX5
ALPK1
MRPS24
ERCC1
NUP188
TAF1A
NME7
TMEM9B
ARID1A
TOMM20
ACOT7
DDX59
PTPN2
CCDC12
DGUOK
RNF207
PTGR2
BLZF1
NUCKS1
TAS2R14
AP2A1
TCF7L2
NRSN2
AUP1
NCDN
KIAA0040
NUDCD3
GPR137
DPYSL3
POLA2
NFIC
MAML1
GPSM3
TRIO
DR1
ATF7IP2
TNKS1BP1
UQCRH
SLC11A2
IFT74
ZNF169
ZNF133
NAB2
FUZ
RNF44
TAX1BP3
STK19
PRIM2
FANCM
ZNF395
C4orf36
USP43
RFC1
IER5
CCDC102B
AAK1
ARHGAP24
PTPRE
TTC39C
RPL29
CCDC84
LAMB2
MTF2
BBX
TERF2
MRPL40
PCDHGC3
SPOP
EEA1
FAP
RDH13
URGCP
AHCYL2
ENC1
TACC2
ZMYND11
ZSCAN21
RALBP1
DNAH14
RBM10
HERC4
C2orf49
CALM3
AZI2
CCDC57
FSTL3
BCKDHA
SNAP23
KPNA1
SARS2
ZNF23
HK1
ZNF33B
ZNF608
LMNA
NVL
VGLL4
ZNF408
PRMT5
ATF6
ZC3H11A
NFKB1
DNAJB5
MBD2
NEXN
IRF2BP2
ANXA11
LNX1
ARID1B
KDM4C
NFX1
DSTN
ALKBH3
HIVEP2
ARRDC1
NUMB
RNF187
GSTCD
HMMR
SAP30BP
PIK3R1
MRPL46
ATP2C1
FMNL1
NR1D1
PPT1
UBE2D3
TSTD2
RNF19A
ERGIC1
MCM7
POLG
TNFSF13
WWC1
COX7A2
THSD1
UXS1
KIAA0319L
UBE2L6
ATP6V0A2
PLA2R1
SLC22A5
SMARCA4
LAMP1
C12orf4
SOCS5
FKBPL
KIF23
KCTD10
PRSS36
CCDC130
MAZ
WDR81
C1orf159
SLC25A28
PCID2
NF2
SCAF1
MBTD1
KCNAB2
EIF3F
POC5
RIN3
TTC7A
PRDM15
ARPC1B
EIF2S3
PLEKHM1
SLC7A7
PUS7
OXSM
RRP15
DLEU1
GAB1
TPM4
CNOT8
DDIT3
WDR12
QRICH1
ZNF184
NEK6
MPDZ
VKORC1L1
TBCE
ZNF181
CASZ1
CDKL3
PLXNB2
SDCCAG8
LRP2BP
MCC
RAD9A
MRPL13
EID2
NUDCD2
BZW2
LAT2
SEMA4B
SNX14
KCTD11
MPDU1
ERAP1
FBXO38
ETS1
PXDN
ING2
CDC42EP4
GLIPR1
ARNT
MECR
ATAD1
YWHAE
ZNF570
RSAD1
ZNF839
ITSN1
CARD10
INTU
CLCN3
LTBR
MSI2
TCTN3
KPNA4
IPPK
TYW1
CHPF
POLR3B
RNF130
SLC36A4
PSMD7
PPA2
STXBP5
SPTAN1
PSAP
RUNX1
TSEN15
FSTL1
RXRA
TBL1X
BCR
MRPS12
SYDE1
LDLR
SLC39A10
MRPL22
SLC43A2
SRGAP3
SMNDC1
TMEM63A
TRIP10
TTC1
LYSMD1
CHEK2
PALLD
TIGD2
FEM1A
UBLCP1
JRK
AGTPBP1
FLNA
SH2D3A
MYH9
PDK2
RIC8A
WHAMM
FLII
DOCK9
SLC27A1
STX18
GPX8
TNIP1
LIAS
WIPF1
EPS8L1
PTGIR
ABHD11
RAD51C
DARS2
SBNO2
SERPINB8
AGTRAP
GIPC1
SYNPO
YTHDC1
TNFAIP1
HCFC1R1
TBRG1
SNX9
PDXK
NAPEPLD
TRIOBP
SET
TCEA2
MICAL2
NDUFV2
HSPA4
MEIS1
ANKLE2
TTLL5
FERMT2
GYS1
IFNGR2
MBP
OTUD7B
TNFRSF10B
CRLS1
FRMD4B
HMOX2
COG2
ANP32A
DHRS7
ABHD14B
SNRPA1
HADH
RHOBTB2
FUBP3
DTNB
SCLY
MEMO1
LPP
HGS
SLFN12
ACOT2
TAX1BP1
SUPT5H
GRHPR
ISYNA1
KIAA0895
USP31
TRIM35
SBF2
CHD4
PRDM5
C12orf73
C21orf59
ATP6V1D
DNAJB4
MBD6
COASY
MTAP
DISC1
EEF2
OXR1
ZNF567
ARHGDIA
CCNI
ZFPM2
MGST3
PARL
CYB5R1
GTF2H1
CUEDC1
PAICS
BAIAP2L1
TES
BTBD19
TFDP2
MYO9A
MTX2
SSBP2
TMBIM1
CDK5RAP3
SGMS1
ATXN10
FOSL2
ACYP2
PLS3
CTNNB1
SEC11A
TK2
THAP9
NR1D2
TRAM1
PTPN11
SLC45A4
TALDO1
SWAP70
MAD1L1
CASP4
ILK
VAC14
FHOD1
AP2B1
DERL1
REV3L
SNX8
ABCA5
TIMM9
ATG16L1
VPS36
SUCLG1
SLC6A6
PIH1D2
KLHL5
DGCR2
ZMYND8
ATL3
BLVRA
SLC38A6
NOLC1
OPTN
SRD5A3
GRB10
TNFAIP6
RIN2
DERA
FNDC3B
PLEKHA7
NMRAL1
SERTAD3
MTMR2
CHST15
CCDC61
CIRBP
CHST11
ARF4
DDX24
NRP1
DIS3L
NUP107
SMAD4
GPX4
ACSS2
ZCWPW2
PIP5K1A
STAMBPL1
C5AR1
TGS1
CTNNA1
LRRC58
FKBP9
SERTAD1
FRMD6
CRTC3
HSPBAP1
RPL35
ASNSD1
SCNM1
STX17
ATOX1
LATS2
PAK6
TXLNG
NSMAF
WASL
ENAH
KLF7
PCYT1A
MBNL1
RBM12
ANAPC13
MYL6
EIF2B3
ANAPC16
RELL1
SAMD12
ABCB10
HDAC7
PRDX6
SSX2IP
SIRPB2
PCMTD1
AMPD3
PCM1
DMPK
NFKBIA
ARV1
SH3D19
TBC1D14
POLE3
ASAP2
MDM4
CTTNBP2NL
ACOT9
COG7
HSPA1L
ZNF611
RTN4
CCNC
SBDSP1
UBR5
USP33
MLEC
CD46
MNT
GADD45A
LARP4
SVIL
NGLY1
PRICKLE2
YOD1
EGFLAM
TBL1XR1
ZP3
DAAM1
JARID2
PARP10
ABLIM1
PSTPIP2
ADIPOR1
ZNF234
SMYD2
THOC6
PKN1
GPN1
KHDRBS1
SEMA4D
DUSP3
ASAP1
NEDD4
PSMG3
BRD4
KIDINS220
STK17A
SFXN3
DHX9
APLF
BCL3
HNRNPA1
SMAP2
GFPT2
ZNF706
FAM160B2
ZNF530
SLC9A1
MED16
GNA11
AIG1
NCOA4
DDX42
HMGB1
SLC24A1
FGGY
LCMT1
SLC7A6
CHCHD3
SCYL3
DGKZ
RABIF
DIAPH1
CSNK1E
SNX29
ACTA2
ALOX5AP
ITGA5
PMEPA1
CPD
GLRX
ABCF2
INTS7
AES
IL4R
OSBPL10
PNPLA2
B4GALT4
STK40
EPN2
TTF2
FAM104A
MAPK8IP3
FLYWCH1
SLC12A4
EIF4G1
PTPN3
SORT1
ZNF678
ZNF546
MED17
MYO1F
ARMCX5
RAD54B
SPAG1
CPEB2
EIF5A2
FLOT1
ABL2
ZNF529
DCP1A
ACBD6
NUP133
STAT3
PTGER4
S100A11
CLDN12
SF3B3
RPS14
TCF4
PANX1
TMEM192
ROR2
SLC39A1
HDAC2
CYB5R3
ZFAT
KDSR
AMACR
UBAP2
TBK1
ARHGAP8
VIM
PDHB
FRMD4A
TLN2
NFYC
SAT2
UBXN4
ZFAND5
CLASP2
MAEA
MICALL1
CDC42BPG
FBXL5
RHBDF1
TXN2
SCMH1
FBXO48
VEGFC
ADAP1
TMX3
LRRC25
FOXO3
EML2
TYW1B
MRVI1
CPEB4
GTF2B
SSR1
ELF3
MBNL2
KLHL12
PICALM
LRRC41
EHD2
POLR2B
PLEKHB2
WARS2
LDHA
STAU2
MCFD2
LAMA5
PPP1R15B
TMF1
THAP6
NAPA
SRI
DMXL2
BCL9
MRPL54
GPD2
VPS41
KIAA0586
SLC16A5
INTS3
KDM4A
NLRP3
MTHFD2L
AFAP1
NCBP1
AP1G1
PRLR
ENO1
OMA1
SAT1
STK11
ULK4
PDK1
RAP1A
CD55
SLC25A3
WWC2
RSRC2
LRCH3
AK3
COL6A3
POMT2
KNTC1
ITPRIP
RBMS2
TPRA1
UBE2J2
ZNF131
DHX30
XPNPEP1
PTK2
CALM2
PBX1
PEX13
ANKRD17
OXCT1
TNRC18
CHD9
PSME4
LUZP1
SMAD1
IP6K2
PDE12
MMP19
HNRNPA2B1
TESK1
ZBTB8A
FAM120B
EBAG9
CNST
FOXK1
PPTC7
ITGB1
MYO1C
TM2D3
DDAH1
SLC12A8
ARHGAP1
AP4E1
REPS1
MANBAL
TOB2
CFDP1
SLC12A6
COPS8
POLR1B
SERTAD4
USP40
PLK3
SLC41A3
FAM49B
PMVK
NPLOC4
ZNF57
CASP1
PRMT1
PTPRG
CENPL
ANGEL2
TIMM44
SAMD4A
DENND3
GCC2
PRDX3
TSNAX
SDCBP
ZNF260
ZHX3
SASH1
THEM4
DNM1L
SHC1
HSF2
CMIP
RAPGEF2
CCDC77
ARL16
BRD8
H6PD
ZNF14
PFN2
ELP3
ASB1
DDB2
AGPS
SLC46A3
PFKFB3
SEC16B
MIA3
FRY
PIK3C2A
ARHGAP21
TAF6
GNAI2
SMG5
RBM27
KIAA0753
HTRA2
BSCL2
BCAP29
APC
HIRA
B4GALT1
DLST
CLCN6
GNB5
C9orf3
GTF2F2
ARFIP1
VPS37B
ECT2
STX10
MCCC1
ELP4
FKBP15
TMEM33
NUP50
TXNRD2
WSB2
TPBG
HARBI1
STAT6
CCDC107
MGAT1
TFEB
VDR
GAA
SRFBP1
ARPP19
ANXA6
GABPB1
ACIN1
ZNF569
TMEM184A
STK32C
SERTAD2
PON2
ARHGAP17
C1orf112
PEPD
CMTM3
MYO1D
C1orf21
HEMK1
ASXL1
CCDC159
EPAS1
FGD4
RIC8B
CBX3
MAT2B
MYH10
IFFO1
CD151
MDH1
LAMC1
ASPSCR1
SGPL1
UBL7
AKAP10
MAML3
USO1
SRA1
MALT1
UBE2Z
GPR157
IFT122
STAT2
AP4M1
RCAN3
ABHD8
GTPBP2
ABCB8
GBE1
RPL32
BRCA1
IL10RB
HEXB
TMEM68
ARPC5L
C15orf62
NFKB2
LONRF1
G3BP2
TRAPPC4
CDK16
ZFAND3
CGN
CARS2
DAPK3
CAMK2G
SLC48A1
TTC3
RRM1
ALDOA
ITPK1
RIOK3
ERI1
TAGLN2
CD3EAP
TEX2
CBX8
TPD52L2
TECR
MARCH6
WDR7
TMEM170B
DYRK3
CAP2
MMS19
GSS
TIPRL
MYL6B
TRMT5
TMEM184B
QKI
NUP153
MAP2K3
SPATA1
LDB2
IVNS1ABP
EFHC1
SLC17A5
LRRC20
CNPY4
RBM22
SMG7
UACA
JKAMP
PRKCH
CD82
FAM50B
HSPA1A
PTK2B
LRRC8A
BZW1
NMT1
POGZ
CPPED1
RB1CC1
MTMR3
THUMPD3
C17orf53
CAB39
NCOA3
OVCA2
IFNGR1
NUP37
CHML
SLC39A13
GZF1
PPP1R13L
CNIH3
PLEC
MAGEF1
TTC13
NUAK2
PXN
TOPORS
BLCAP
POLQ
TMCO6
RASAL2
CNOT4
ABCF1
SEC31A
AAAS
THNSL2
TFAP2A
RBBP5
NPTN
PIK3C2B
RAB5B
TRAPPC9
ETS2
CEP78
PPAT
ARHGEF2
HNRNPD
THBS1
RRM2B
SBDS
PLA2G6
ZNF620
TRIP6
RAB43
FBXW7
BOLA1
LACTB2
TJP2
CAPN2
ABCB9
VPS72
UBE2D2
CCDC88C
HSD17B12
MAPKAPK3
FAM13A
MPV17
B4GALT2
TATDN3
LEMD2
AGAP3
ARID3B
NDE1
DUSP8
DPAGT1
MED20
DAG1
SUB1
EPHA10
HPS5
ACTN1
RIMKLB
LYPLAL1
SSR3
CISH
OPN3
TMEM209
UHRF1BP1L
CHMP1B
GARNL3
ZNF432
ACY1
NFXL1
RABGAP1L
RTEL1
GON4L
RHOT1
CHD8
ILF3
PARN
RPL24
CUL2
TREX1
IFT20
ATP2B4
FAM177A1
RNF11
HSD17B8
BRWD1
GPR137B
GM2A
ITGA1
ARHGEF17
MRPS11
TBPL1
DISP1
TTC7B
IFI16
FEZ2
STK10
NACC2
GNS
TOR1AIP2
CORO1C
INPP5K
METTL5
CSDE1
CDC40
GSPT1
KANK1
TMEM50A
UBE2B
NSMCE1
USPL1
ELL
RAB27A
EXT2
DSTYK
SNX12
POLI
PKP4
TRNAU1AP
ZBTB47
RAB11FIP5
NEDD4L
EIF2B2
CTDSP1
SLC2A4RG
CRY2
EIF4G3
ARL6IP5
SLC20A2
CDC5L
ZNF687
CKS1B
RAD50
CNN3
C3orf18
TFB2M
MTBP
FGFRL1
2021-09-11
EPB41L4A
MAFK
MMRN2
RALGPS1
ZNF580
VPS13D
OGT
POLR2L
HNRNPM
TEF
PDCD6
ALG10B
GABARAPL1
EHD1
RAB3D
SIRT4
TMSB10
TXNIP
LSM14A
CDRT4
CYP27A1
CTSB
TMEM138
NOTCH4
SLC38A1
FLOT2
MITF
DHODH
KIF1B
HIVEP1
ZFR
2021-09-10
DYRK1A
FANCE
LIMA1
RPS25
DICER1
UEVLD
KCTD3
SIPA1L3
BCL9L
BMI1
BDP1
PUF60
HRH1
ZNF438
PPFIBP1
ENTPD1
GLB1
LDLRAP1
TRIM25
CRYZL1
C2CD2L
DNAJB12
GINS1
TEAD1
ZFHX3
UBE2F
SCRN1
UCK2
CLIC4
ZFP36L1
KCTD20
BIRC6
WTIP
RASGRP3
GADD45B
INF2
NCOA1
ADAMTS6
IDH3A
WDR34
SOS2
CLASP1
PIGV
RAB24
WDR13
HEATR1
ANXA2
CFLAR
RPL6
ERCC3
AP2M1
NOTCH2
CBX5
TJAP1
ETF1
TBC1D19
VCL
AMPD2
PHLDB1
DNAJA1
PHACTR4
RNF139
RSPH3
SH3KBP1
RGMB
CEP350
DUSP14
ERP29
AP2S1
SCNN1A
ZNF217
SMPDL3B
ANTXR2
CD59
DDX10
LRRFIP2
ZNF76
LITAF
AGAP1
ZBTB38
RPS6KA4
DDAH2
ARHGEF10L
DNAJC7
SAMSN1
PDE8A
DAXX
GSN
ZNF669
AMOTL2
TMEM143
RAB11FIP3
TUBB6
TRIM5
TRAPPC3
CLPTM1L
HES1
ASCC1
MTHFS
NBEAL1
ATF6B
RHBDD2
TBC1D4
BLVRB
CLIP1
PRCP
PPP2R5A
MRI1
ZNF672
ZNF451
ARPC5
PTPRF
TSPAN4
ITPKC
MAPK3
WEE1
ID3
CNNM4
ZNF710
FADS3
YAP1
PDCD11
POT1
APBA3
GTF3A
PML
MAP4
LCA5
FKBP3
KDM3A
BHLHE40
KDM5B
ZNF668
SLC25A35
ZMYM4
EHBP1
ELMOD3
HSPA9
ATP6V0A1
AP3S2
SKA2
SNRPE
PARP1
DUS3L
CCHCR1
AXL
OLR1
EIF3M
APTX
MGST1
PHLPP2
KIF20A
MRPS23
EDEM2
PTP4A1
NEK7
HBP1
BRD3
B2M
PKP3
SGPP1
PNRC2
GRHL2
DDA1
IARS
WDR43
FAF2
FBXO31
RNF167
ZNF497
SUCLA2
PRR5L
KLF10
BMS1P4
AHCTF1
CDK5RAP2
ARID5B
ZCCHC2
PLAA
DIS3L2
CYB5A
SUCLG2
MVP
AHNAK
SETD1A
DNAJC17
PGM3
AMOTL1
MVK
DAGLB
DOCK5
TMOD3
MAPKBP1
NDUFA4
ULK2
SMAD7
EIF4A2
DPP9
SH3BP4
NDUFAF2
XBP1
TMEM205
GUK1
PPP2R1A
TP53BP2
RFX2
CCDC85C
UTRN
AHR
EDEM1
PPP5C
PAFAH2
INO80B
PLCD1
P4HA2
MIDN
MAD2L1BP
ITGB5
TBC1D22A
RPL23AP53
FAS
RAD23B
PSEN1
TRIM6
CTDSPL2
CTNNAL1
CD34
MAPK6
OCLN
2021-09-09
S100A16
WASF2
RORA
HDGF
NPC1
FTL
EIF2S1
FBXO33
UQCRC2
BTBD10
HEATR5A
LARP1
NSUN6
SSBP3
LYST
GNG5
CTDSP2
ZNF83
MAP4K4
LBR
DBP
RPL27
ESRP2
RNASEK
PRKCI
SCFD1
PDLIM2
HSBP1L1
SYTL3
LRBA
F2RL1
BDH1
GRN
AKNA
TOM1
SPRED2
FUS
FUK
ATAD2
FAM45A
APBB2
P4HTM
KDM5A
CLN6
THADA
YWHAG
DMXL1
SLC44A3
PTCD1
CNN2
PLEKHG2
C11orf24
XPO6
CLTB
ZNF860
ZNF784
SH3TC1
MFAP1
GPN3
NKIRAS1
MRPS14
NKIRAS2
STAT1
YY1
SENP8
CD2BP2
SNX24
DAB2
UBAC2
POC1A
CRIM1

## Sheet: AP-1 motif proximal
TNIP1
TOR1AIP2
EPS8L1
METTL5
PPP1R15A
PTGIR
MTHFR
ST5
EXT2
TPRA1
ZNF7
AGTRAP
SYNPO
SRPX2
SMAD3
PBX1
ANKRD17
DUSP23
CLEC2B
PSME4
ZBTB47
NAPEPLD
NEDD4L
NBR1
MMP19
FAM120B
MEIS1
PPTC7
GALNT10
DHRS4L2
CLEC14A
ITGB1
TM2D3
SHE
DDAH1
RFFL
MBP
MANBAL
HM13
MMRN2
MAFK
CFDP1
COPS8
SLC4A1AP
COG2
ANP32A
RHOBTB2
EIF2AK4
EHD1
RAB3D
SERTAD4
NPLOC4
LEKR1
ZFR
AHCYL1
BRD2
SBF2
TRIM35
DENND3
ABCG1
ZFPM2
MGST3
PARL
CALD1
SPINT1
SCRN1
ERCC1
NUP188
CDK5RAP3
SGMS1
KCTD20
ACYP2
CCDC12
BIRC6
THAP9
SLC46A3
GADD45B
ADAMTS6
WDR34
FRY
ARHGAP21
CLASP1
GNAI2
CFLAR
KIAA0753
SLC6A6
GPR137
CLCN6
DPYSL3
NOTCH2
ZMYND8
C9orf3
GTF2F2
BLVRA
NFIC
SRD5A3
ELP4
TNFAIP6
DERA
FANCM
STAT6
ZNF217
MTMR2
PTPRE
CCDC84
DDX10
LITAF
CHST11
TERF2
NRP1
ARHGEF10L
GPX4
ACIN1
PDE8A
RDH13
STAMBPL1
GSN
ENC1
MYO1D
SERTAD1
ZSCAN21
TRIM5
TRAPPC3
CCDC159
TXLNG
ENAH
KLF7
MBNL1
CD151
LAMC1
ZNF451
ASPSCR1
EIF2B3
MAPK3
BCKDHA
SAMD12
HK1
UBE2Z
SIRPB2
ZNF33B
LMNA
VGLL4
GTF3A
PML
IFT122
CTTNBP2NL
RCAN3
ANXA11
COG7
ZNF611
NFX1
RTN4
ELMOD3
GBE1
BRCA1
AP3S2
GADD45A
SVIL
PRICKLE2
C15orf62
EGFLAM
LONRF1
MRPL46
ATP2C1
ABLIM1
PPT1
CGN
TTC3
ALDOA
BRD4
UXS1
KIDINS220
GRHL2
KIAA0319L
WDR43
SMAP2
GFPT2
FBXO31
RNF167
SLC22A5
CAP2
PRSS36
AHCTF1
CCDC130
QKI
SLC25A28
MVP
MAP2K3
DNAJC17
ITGA5
MVK
DAGLB
PRKCH
MAPKBP1
PNPLA2
PTK2B
LRRC8A
STK40
DLEU1
TMEM205
FAM104A
MTMR3
CAB39
CNIH3
UTRN
PLEC
CPEB2
SDCCAG8
MCC
RAD9A
ABL2
INO80B
BZW2
PXN
PLCD1
POLQ
CLDN12
TCF4
FBXO38
TBC1D22A
CTNNAL1
SEC31A
MECR
2021-09-09
NPTN
VIM
ARHGEF2
FTL
ZFAND5
ZNF620
MAEA
MICALL1
CDC42BPG
CAPN2
UBE2D2
SCMH1
KPNA4
EML2
PPA2
LRBA
PSAP
TATDN3
EHD2
POLR2B
ARID3B
RXRA
AKNA
BCR
STAU2
SPRED2
LAMA5
LDLR
TTC1
THADA
PALLD
YWHAG
VPS41
RTEL1
JRK
AFAP1
SH2D3A
PRLR
RPL24
ENO1
MYH9
SAT1
TREX1
HSD17B8
MRPS11
DISP1
FEZ2

## Sheet: TEAD motif proximal
TNIP1
INPP5K
SLC1A5
EXOC4
CCDC148
KANK1
LRCH3
AK3
COL6A3
POMT2
ELL
MYL12B
PABPC1
UBE2J2
GIPC1
POLI
TBC1D2B
PKP4
PHLDA3
NUAK1
FPGS
MYL12A
RRAS
SET
SHROOM2
TCEA2
PDE12
TESK1
HSPA4
CRY2
CNST
SLC20A2
ANKLE2
FERMT2
CKS1B
ITGB1
MYO1C
CREB3L2
CNN3
CD160
TFB2M
AP4E1
MICA
2021-09-11
EPB41L4A
FNBP4
TNFRSF10B
COPS8
VPS13D
HNRNPM
POLR1B
ALG10B
SIRT4
SERTAD4
ATP13A2
SLC41A3
PMVK
LPP
CYP27A1
FER
ACOT2
NOTCH4
SUPT5H
VPS45
GRHPR
SEH1L
ISYNA1
KIAA0895
2021-09-10
USP31
CHD4
PRDM5
DYRK1A
ANGEL2
LIMA1
SAMD4A
MBD6
PRDX3
BCL9L
EEF2
BDP1
ZNF438
PPFIBP1
CAST
ZHX3
SASH1
TMEM9
CYB5R1
CRIM1
DNM1L
SYNE2
PRRG1
CUEDC1
SHC1
RAPGEF2
TEAD1
TFDP2
CALD1
ZFHX3
SSH1
UBE2F
UCK2
ASB1
CLIC4
KCTD20
DDB2
PTPN2
WTIP
TAS2R14
TK2
PFKFB3
TRAM1
PTPN11
TCF7L2
PIK3C2A
SWAP70
MAD1L1
CLASP1
FHOD1
DERL1
ABCA5
RPL6
VPS36
SUCLG1
ERCC3
KLHL5
AP2M1
CBX5
TJAP1
DGCR2
C9orf3
ARFIP1
VPS37B
ECT2
PHLDB1
TRIO
GPSM3
PHACTR4
STX10
RSPH3
SH3KBP1
ATF7IP2
CEP350
TMEM33
RIN2
SLC11A2
UQCRH
IFT74
ZNF133
RNF44
TAX1BP3
TPBG
HARBI1
SCNN1A
C4orf36
USP43
SMPDL3B
CCDC107
CHST15
CCDC102B
ARHGAP24
TFEB
LAMB2
ZBTB38
AGAP1
ARF4
FAP
PIP5K1A
C5AR1
TGS1
SERTAD2
LRRC58
PEPD
CMTM3
AMOTL2
TMEM143
FRMD6
RPL35
CRTC3
ATOX1
CLPTM1L
LATS2
MYH10
BLVRB
HERC4
IFFO1
PRCP
MRI1
ARPC5
SGPL1
WEE1
SNAP23
SARS2
FADS3
ZNF23
SSX2IP
ZNF608
LMNA
DMPK
ZC3H11A
IFT122
NFKB1
ASAP2
MBD2
LCA5
LNX1
ARID1B
HSPA1L
ZNF611
ALKBH3
EHBP1
ABCB8
GBE1
ARRDC1
CD46
MNT
TMEM68
SKA2
ARPC5L
YOD1
PIK3R1
PSTPIP2
TSTD2
EIF3M
RNF19A
KHDRBS1
PHLPP2
CAMK2G
SLC48A1
DUSP3
POLG
PSMG3
WWC1
RIOK3
PNRC2
THSD1
DDA1
CD3EAP
TECR
SFXN3
PLA2R1
FAM160B2
SLC9A1
MMS19
GNA11
BMS1P4
KIF23
ARID5B
MAZ
LCMT1
SLC7A6
QKI
C1orf159
PCID2
DIS3L2
AHNAK
NUP153
SETD1A
MBTD1
SCAF1
ACTA2
PMEPA1
AMOTL1
EFHC1
CPD
SLC17A5
INTS7
PRDM15
NDUFA4
ARPC1B
ULK2
SMAD7
CD82
PLEKHM1
SH3BP4
OSBPL10
SLC7A7
HSPA1A
DLEU1
EPN2
TPM4
POGZ
CNOT8
DDIT3
QRICH1
SLC12A4
MPDZ
NCOA3
TP53BP2
VKORC1L1
SORT1
ZNF678
SLC39A13
MED17
PPP1R13L
CCDC85C
UTRN
MAGEF1
AHR
SPAG1
PLXNB2
LRP2BP
EDEM1
EIF5A2
EID2
P4HA2
KCTD11
S100A11
GLRX
SF3B3
ETS1
RASAL2
TMEM192
RPL23AP53
FAS
SEC31A
CD34
RBBP5
CEP78
UBAP2
HDGF
THBS1
CLASP2
LACTB2
HEATR5A
LARP1
SSBP3
TXN2
CCDC88C
LTBR
IPPK
CTDSP2
ZNF83
TMX3
ESRP2
SCFD1
FAM13A
ELF3
SPTAN1
EHD2
LRRC41
POLR2B
AGAP3
TBL1X
PLEKHB2
WARS2
GRN
TOM1
MED20
STAU2
MRPS12
EPHA10
SLC39A10
RIMKLB
SRI
SSR3
CHEK2
TIGD2
PLEKHG2
C11orf24
GON4L
FLNA
NCBP1
OMA1
MYH9
PDK2
ATP2B4
RIC8A
YY1
CD2BP2
SNX24
ARHGEF17
WWC2
TBPL1
SLC27A1
TJP2
POC1A

## Sheet: JUN and TEAD motif proximal
GNS
RSRC2
TMEM50A
KNTC1
XPNPEP1
SH3GL1
PDXK
RAB11FIP5
FPGS
MYL12A
NEDD4L
MICAL2
NDUFV2
ITGB1
MBP
SLC12A6
CRLS1
PDCD6
EHD1
TMSB10
CCDC121
SLFN12
ZNF57
B3GALNT2
TAX1BP1
DHODH
HIVEP1
BCKDHB
DENND3
ZFPM2
PEA15
SLC20A1
BAIAP2L1
TES
SSH1
UBE2F
ELP3
ATXN10
RASGRP3
TK2
NCOA1
NR1D2
SEC16B
TALDO1
VAC14
RAB24
WDR13
RBM27
SNX8
BSCL2
DLST
GTF2F2
FKBP15
DUSP14
PLEKHA7
ERP29
PRIM2
WSB2
ZNF395
ZNF217
AAK1
ZBTB38
CIRBP
DDX24
DNAJC7
SPOP
SAMSN1
ARPP19
EEA1
FAP
ACSS2
C5AR1
FKBP9
TACC2
ZMYND11
RAB11FIP3
C1orf21
STX17
NSMAF
RHBDD2
CLIP1
CCDC57
PTPRF
SNAP23
AKAP10
CNNM4
SIRPB2
TBC1D14
NFKB2
MRPL46
PARP10
ADIPOR1
AXL
GPN1
MGST1
IARS
TPD52L2
FAF2
TMEM170B
C12orf4
KLF10
WDR81
FGGY
ZCCHC2
PCID2
CYB5A
CSNK1E
ALOX5AP
AES
PLEKHM1
PUS7
NDUFAF2
CHML
RFX2
STAT3
P4HA2
SNX14
ERAP1
ITGB5
ETS1
THNSL2
CD34
TFAP2A
ATAD1
S100A16
PIK3C2B
TBK1
PLA2G6
TRIP6
RHBDF1
INTU
VPS72
CLCN3
ADAP1
HSD17B12
EML2
FAM13A
PDLIM2
LEMD2
TBL1X
MED20
FUK
DMXL2
OPN3
UHRF1BP1L
XPO6
NLRP3
SH3TC1
PARN
NKIRAS1
NKIRAS2
RNF11
GM2A
MRPS11
UBAC2
