# Supplementary material for: YAP and TAZ are transcriptional co-activators of AP-1 proteins and STAT3 during breast cellular transformation
Source: eLife journal article supplement (doi:10.7554/elife.67312), 2021-08-31
Supplement: supp [file elife-67312-supp-v1.zip › elife_poa_e67312_Supplementary_file_4.xlsx]

## Sheet: -log10(q-value) GO enrichment
GO term	AP-1 target genes	TEAD target genes	STAT target genes
biological regulation	3836	2572	1000
tube morphogenesis	3212	1372	1000
anatomical structure morphogenesis	3159	1000	1000
positive regulation of cellular component organization	2708	1000	1000
regulation of cellular process	2668	2180	1000
developmental process	2506	1000	1000
regulation of biological process	2491	2393	1000
anatomical structure development	2480	1000	1000
regulation of cellular component organization	2469	2079	1000
Unclassified	2462	2321	1000
tube development	2457	1000	1000
biological_process	2427	2313	1000
multicellular organism development	2319	1000	1000
blood vessel endothelial cell migration	2234	1000	1000
endothelial cell migration	2222	1000	1000
epithelium migration	2212	1000	1000
tissue migration	2063	1000	1000
regulation of developmental process	2045	1000	1000
regulation of organelle organization	2035	1460	1000
anatomical structure formation involved in morphogenesis	2011	1000	1000
regulation of response to stimulus	1979	1903	1000
regulation of catalytic activity	1971	1000	1000
regulation of protein metabolic process	1967	1000	1000
regulation of molecular function	1821	1000	1000
angiogenesis	1730	1305	1000
system development	1728	1000	1000
epithelial cell migration	1726	1000	1000
nitrogen compound metabolic process	1695	1684	1000
in utero embryonic development	1678	1000	1000
regulation of cellular protein metabolic process	1484	1000	1000
embryo development	1402	1000	1000
positive regulation of cell projection organization	1380	1000	1000
chordate embryonic development	1380	1000	1000
organonitrogen compound metabolic process	1379	1000	1000
positive regulation of protein metabolic process	1371	1000	1000
positive regulation of cellular protein metabolic process	1338	1000	1000
regulation of myoblast fusion	1303	1000	1000
regulation of t-circle formation	1300	1000	1000
positive regulation of cellular process	2420	5230	1000
organelle organization	1395	5136	1000
actin filament-based process	1429	5047	1000
actin cytoskeleton organization	1340	5041	1000
cellular component organization	2241	5003	1000
cellular component organization or biogenesis	2219	4996	1000
negative regulation of cellular process	3848	4991	1000
positive regulation of biological process	2495	4893	1000
cellular process	2281	4511	1000
cytoskeleton organization	1323	4171	1000
negative regulation of biological process	3178	3738	1000
regulation of actin filament organization	1000	3730	1000
response to topologically incorrect protein	1000	3502	1000
regulation of metabolic process	1857	3487	2426
response to unfolded protein	1000	3483	1000
cellular response to stress	1000	3366	1000
cell migration	1000	3220	1000
RNA biosynthetic process	1000	3188	1000
vasculature development	2635	3178	1000
regulation of actin filament-based process	1000	3148	1000
movement of cell or subcellular component	1000	3097	1000
positive regulation of metabolic process	1000	3083	2179
blood vessel development	2547	3081	1000
nucleic acid-templated transcription	1000	3035	1000
transcription, DNA-templated	1000	3032	1000
regulation of supramolecular fiber organization	1000	3006	1000
localization	1000	2987	1000
regulation of actin cytoskeleton organization	1000	2963	1000
protein localization	1000	2959	1000
cellular response to topologically incorrect protein	1000	2939	1000
cellular response to unfolded protein	1000	2921	1000
circulatory system development	1785	2886	1000
regulation of signal transduction	1368	2824	1000
ameboidal-type cell migration	1682	2815	1000
response to endoplasmic reticulum stress	1000	2812	1000
regulation of cellular metabolic process	2118	2810	2311
cell motility	1000	2810	1000
regulation of cytoskeleton organization	1714	2810	1000
localization of cell	1000	2796	1000
negative regulation of signal transduction	1000	2788	1000
positive regulation of cellular metabolic process	1000	2767	1000
negative regulation of cell communication	1000	2680	1000
negative regulation of signaling	1000	2668	1000
cellular macromolecule metabolic process	1000	2602	1000
platelet-derived growth factor receptor signaling pathway	1000	2553	1000
macromolecule localization	1000	2539	1000
endoplasmic reticulum unfolded protein response	1000	2539	1000
locomotion	1000	2517	1000
regulation of cellular component biogenesis	1000	2510	1000
positive regulation of macromolecule metabolic process	1000	2344	2247
blood vessel morphogenesis	1987	2339	1000
transcription by RNA polymerase II	1000	2318	1000
regulation of nitrogen compound metabolic process	1000	2268	2018
transmembrane receptor protein tyrosine kinase signaling pathway	1000	2167	1000
cellular component assembly	1000	2159	1000
nucleobase-containing compound biosynthetic process	1000	2159	1000
cellular component biogenesis	1000	2152	1000
regulation of intracellular transport	1000	2152	1000
cellular localization	1000	2146	1000
regulation of primary metabolic process	1670	2143	2142
hippo signaling	1000	2141	1000
heterocycle biosynthetic process	1000	2119	1000
response to stress	1000	2118	1000
regulation of macromolecule metabolic process	1000	2114	2015
aromatic compound biosynthetic process	1000	2100	1000
regulation of cell-matrix adhesion	1000	2086	1000
regulation of actin filament bundle assembly	1000	2085	1000
negative regulation of response to stimulus	1708	2063	1000
positive regulation of apoptotic process	1000	2000	1000
positive regulation of programmed cell death	1000	1917	1000
organic cyclic compound biosynthetic process	1000	1903	1000
regulation of cell communication	1000	1883	1000
cellular metabolic process	1000	1870	1000
regulation of signaling	1000	1866	1000
regulation of cellular localization	1000	1833	1000
positive regulation of biosynthetic process	1000	1807	1000
regulation of cell-substrate junction organization	1000	1796	1000
regulation of cell-substrate adhesion	1000	1759	1000
positive regulation of nitrogen compound metabolic process	1000	1757	1000
positive regulation of locomotion	1000	1757	1000
regulation of locomotion	1000	1747	1000
positive regulation of cellular biosynthetic process	1000	1738	1000
positive regulation of macromolecule biosynthetic process	1000	1733	1000
positive regulation of cell migration	1000	1733	1000
regulation of cell migration	1000	1695	1000
establishment or maintenance of cell polarity	1000	1662	1000
enzyme linked receptor protein signaling pathway	1000	1642	1000
regulation of intracellular signal transduction	1000	1636	1000
regulation of localization	1000	1635	1000
regulation of cell death	1000	1633	1000
regulation of actomyosin structure organization	1000	1631	1000
positive regulation of cell death	1000	1627	1000
positive regulation of cell motility	1000	1620	1000
positive regulation of vasculogenesis	1000	1595	1000
nitrogen compound transport	1000	1593	1000
negative regulation of intracellular signal transduction	1000	1593	1000
regulation of catabolic process	1000	1588	1000
regulation of protein-containing complex assembly	1000	1564	1000
cellular nitrogen compound biosynthetic process	1000	1559	1000
regulation of cell motility	1000	1542	1000
positive regulation of cellular component movement	1000	1539	1000
cellular macromolecule localization	1000	1538	1000
regulation of protein polymerization	1000	1532	1000
regulation of cellular protein localization	1000	1523	1000
positive regulation of RNA metabolic process	1000	1520	1000
regulation of apoptotic process	1000	1507	1000
macromolecule metabolic process	1000	1493	1000
establishment of localization in cell	1000	1492	1000
body morphogenesis	1000	1472	1000
negative regulation of organelle organization	1000	1465	1000
cellular protein localization	1000	1403	1000
regulation of basement membrane assembly involved in embryonic body morphogenesis	1000	1401	1000
sensory perception of smell	1000	1399	1000
positive regulation of basement membrane assembly involved in embryonic body morphogenesis	1000	1398	1000
regulation of basement membrane organization	1000	1395	1000
RNA metabolic process	1000	1393	1000
regulation of biological quality	1000	1393	1000
regulation of cell-substrate junction assembly	1000	1390	1000
metabolic process	1000	1390	1000
regulation of focal adhesion assembly	1000	1387	1000
regulation of actin polymerization or depolymerization	1000	1383	1000
cellular response to stimulus	1000	1379	1000
cellular response to chemical stimulus	1000	1374	1000
regulation of cellular component movement	1000	1372	1000
regulation of actin filament length	1000	1370	1000
regulation of extracellular matrix disassembly	1000	1320	1000
regulation of cell adhesion	1000	1319	1000
regulation of stress fiber assembly	1000	1317	1000
establishment of protein localization	1000	1302	1000
primary metabolic process	1000	1301	1000
response to molecule of bacterial origin	1000	1000	2140
response to lipid	1000	1000	2052
response to lipopolysaccharide	1000	1000	1975
regulation of isomerase activity	1000	1000	1827
positive regulation of isomerase activity	1000	1000	1790
regulation of response to stress	1000	1000	1431
regulation of gene expression	1000	1000	1409
regulation of interleukin-1 beta production	1000	1000	1321
