# Supplementary figures and images for: YAP and TAZ are transcriptional co-activators of AP-1 proteins and STAT3 during breast cellular transformation
Source: eLife journal article supplement (doi:10.7554/elife.67312), 2021-08-31

Figure 3-figure supplement 1

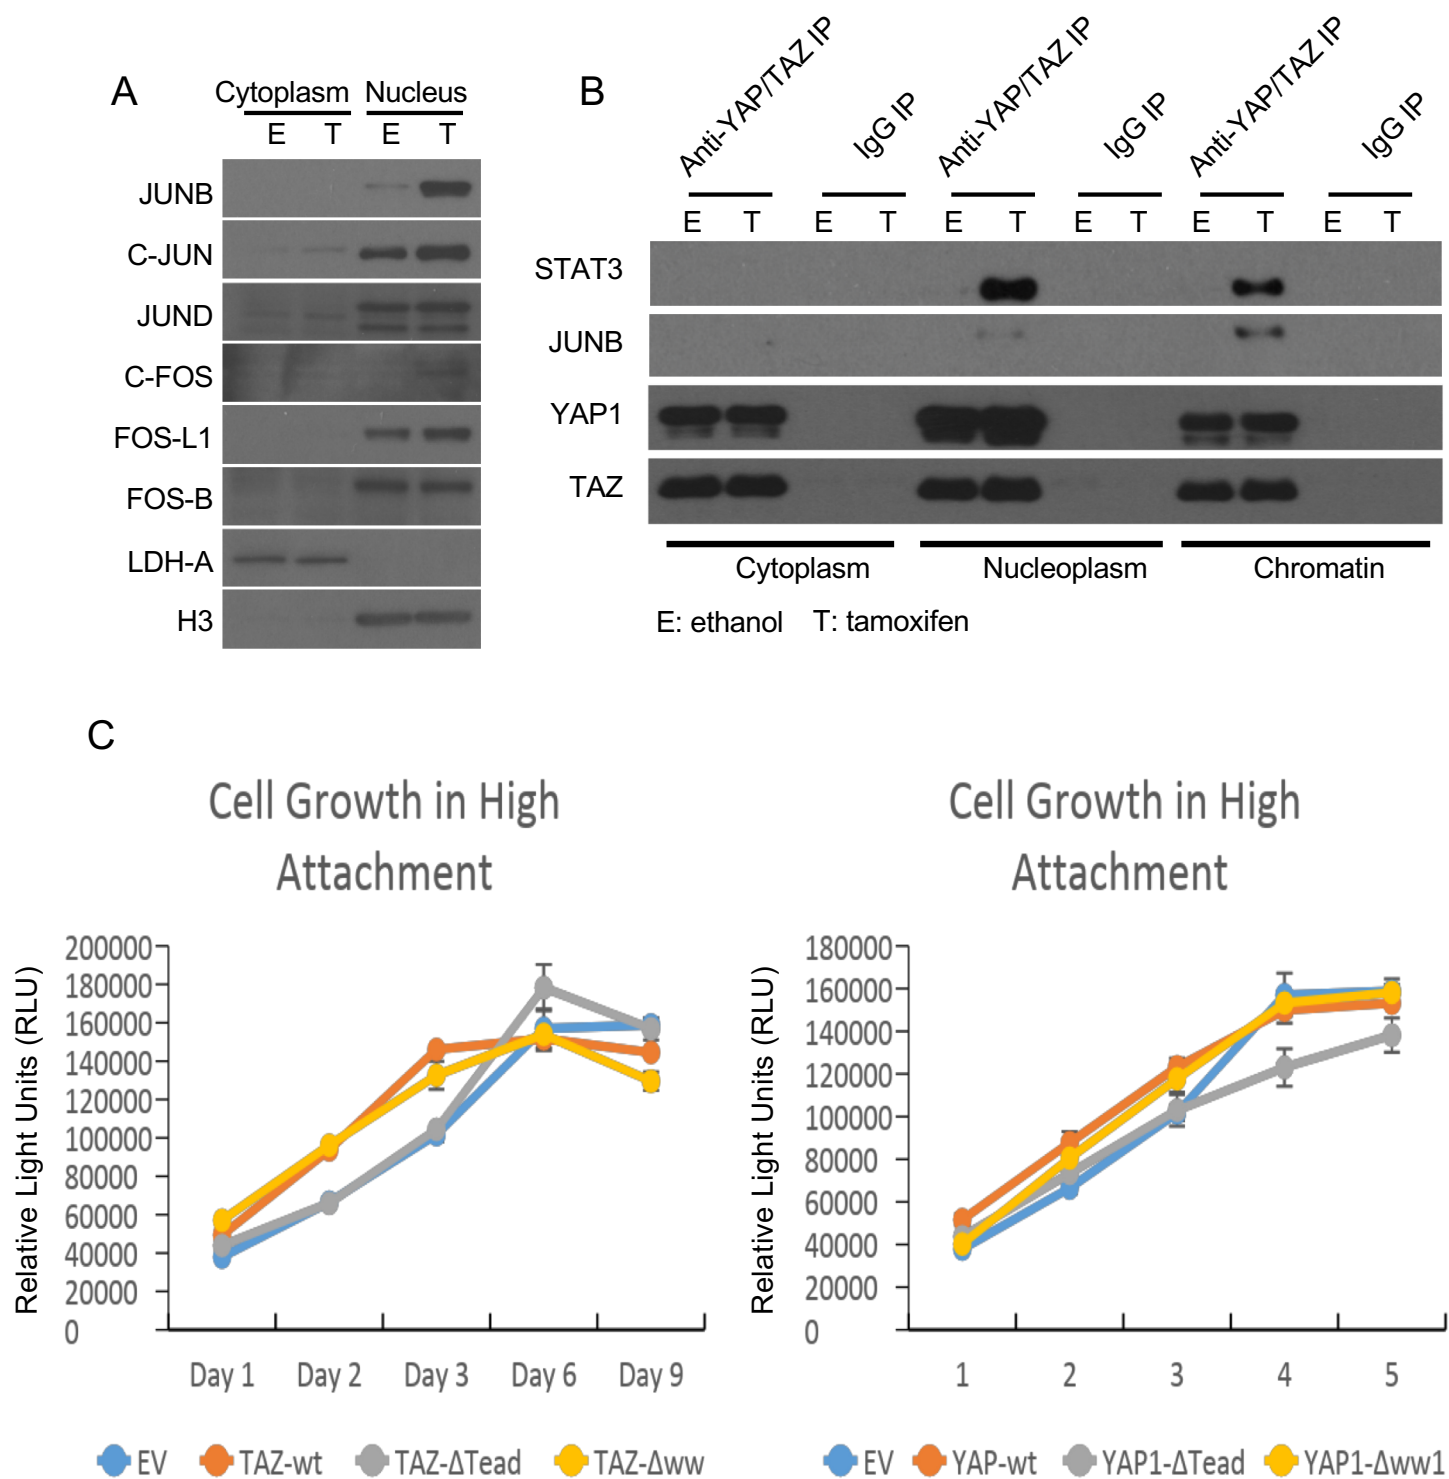

Supplement: supp [file elife-67312-supp-v1.zip]

**Figure 6-figure supplement 3**

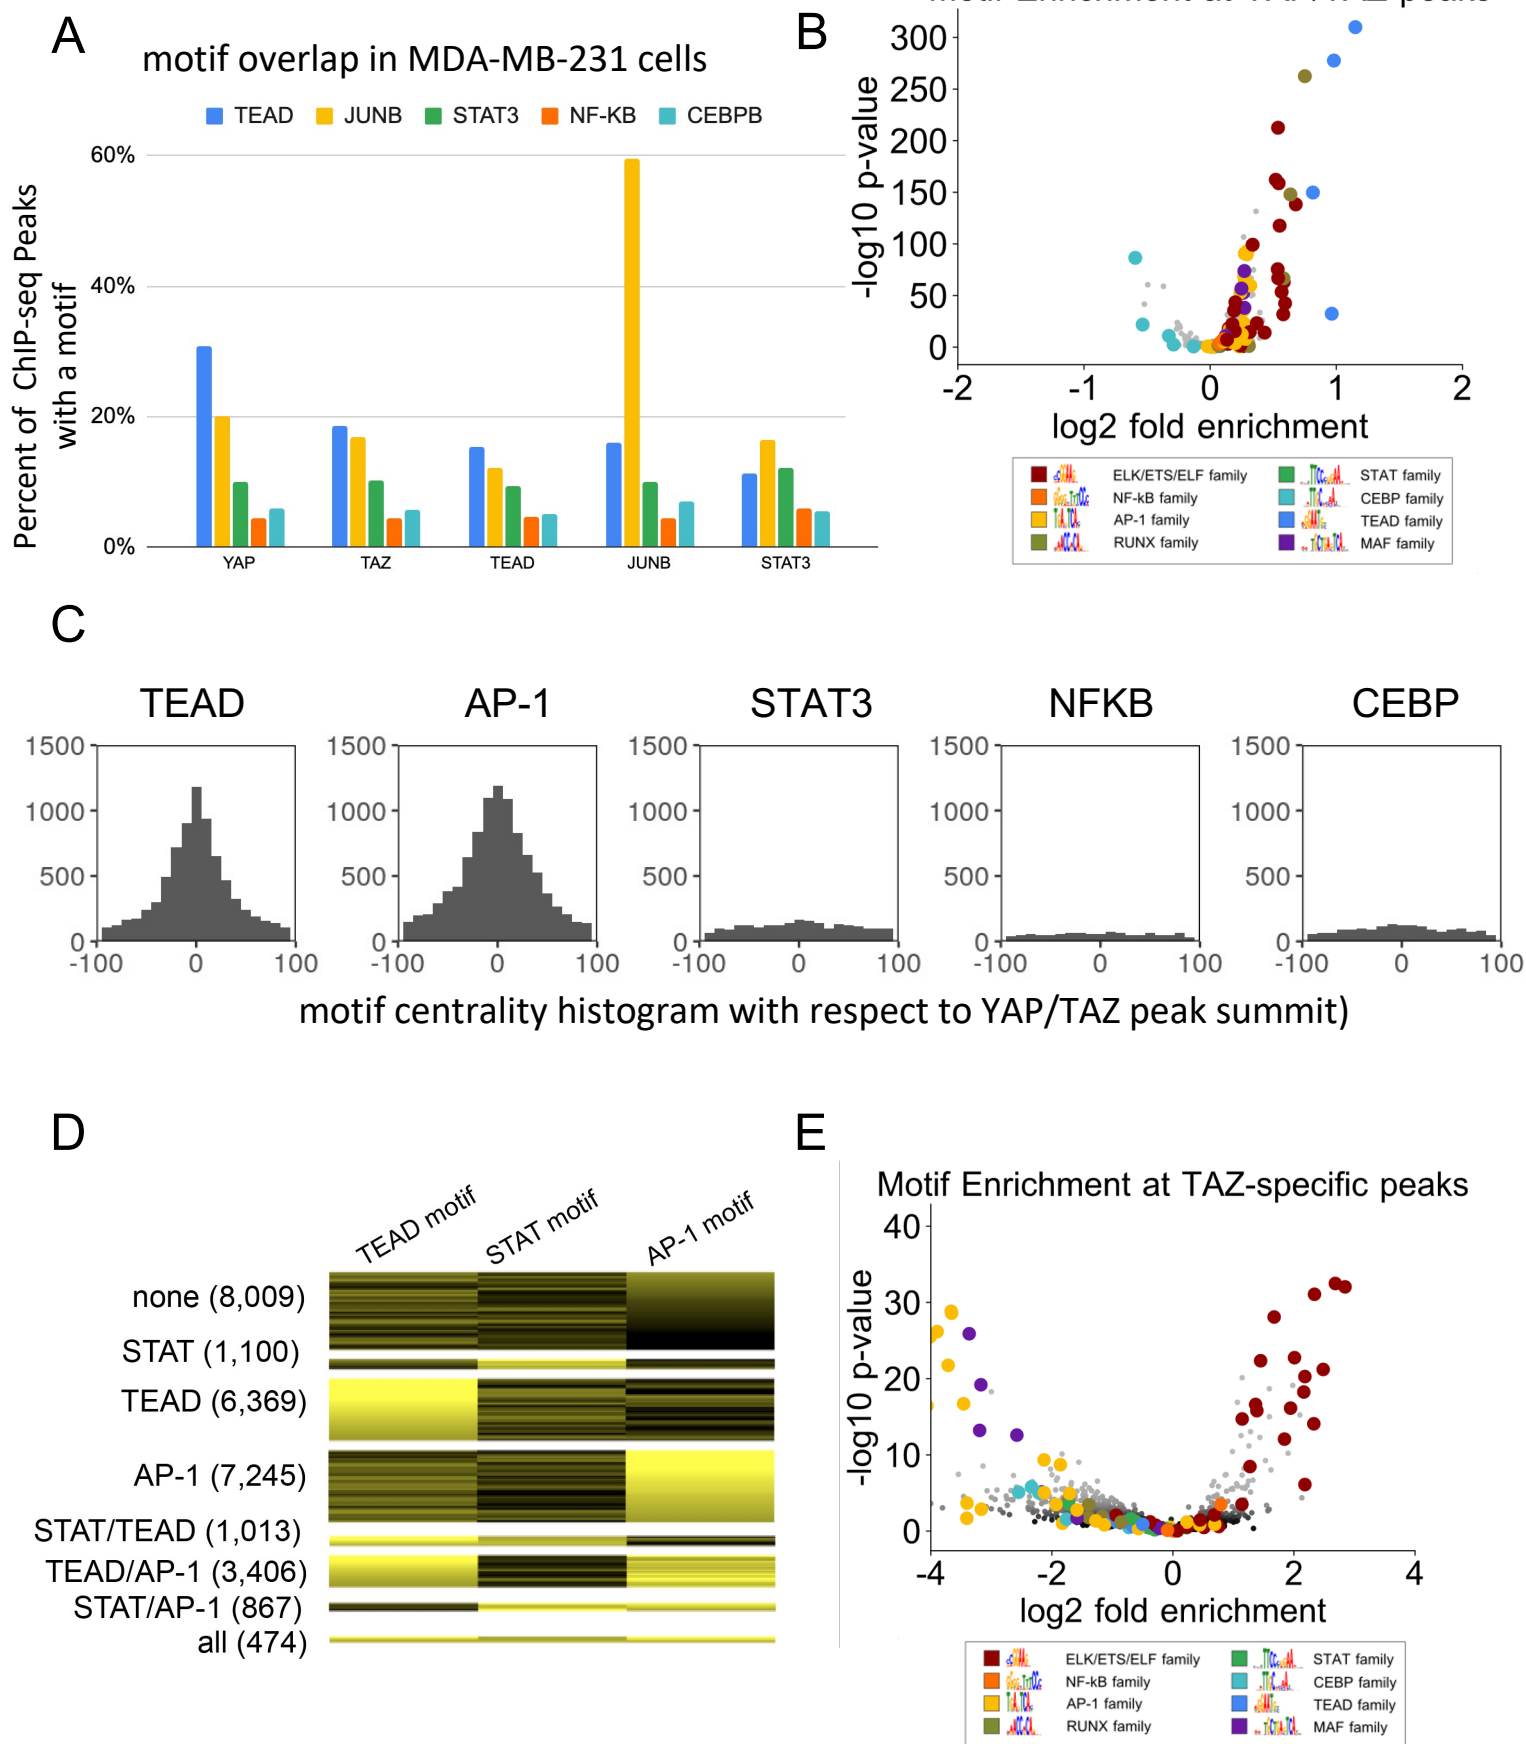

Supplement: supp [file elife-67312-supp-v1.zip]

Figure 5-figure supplement 1

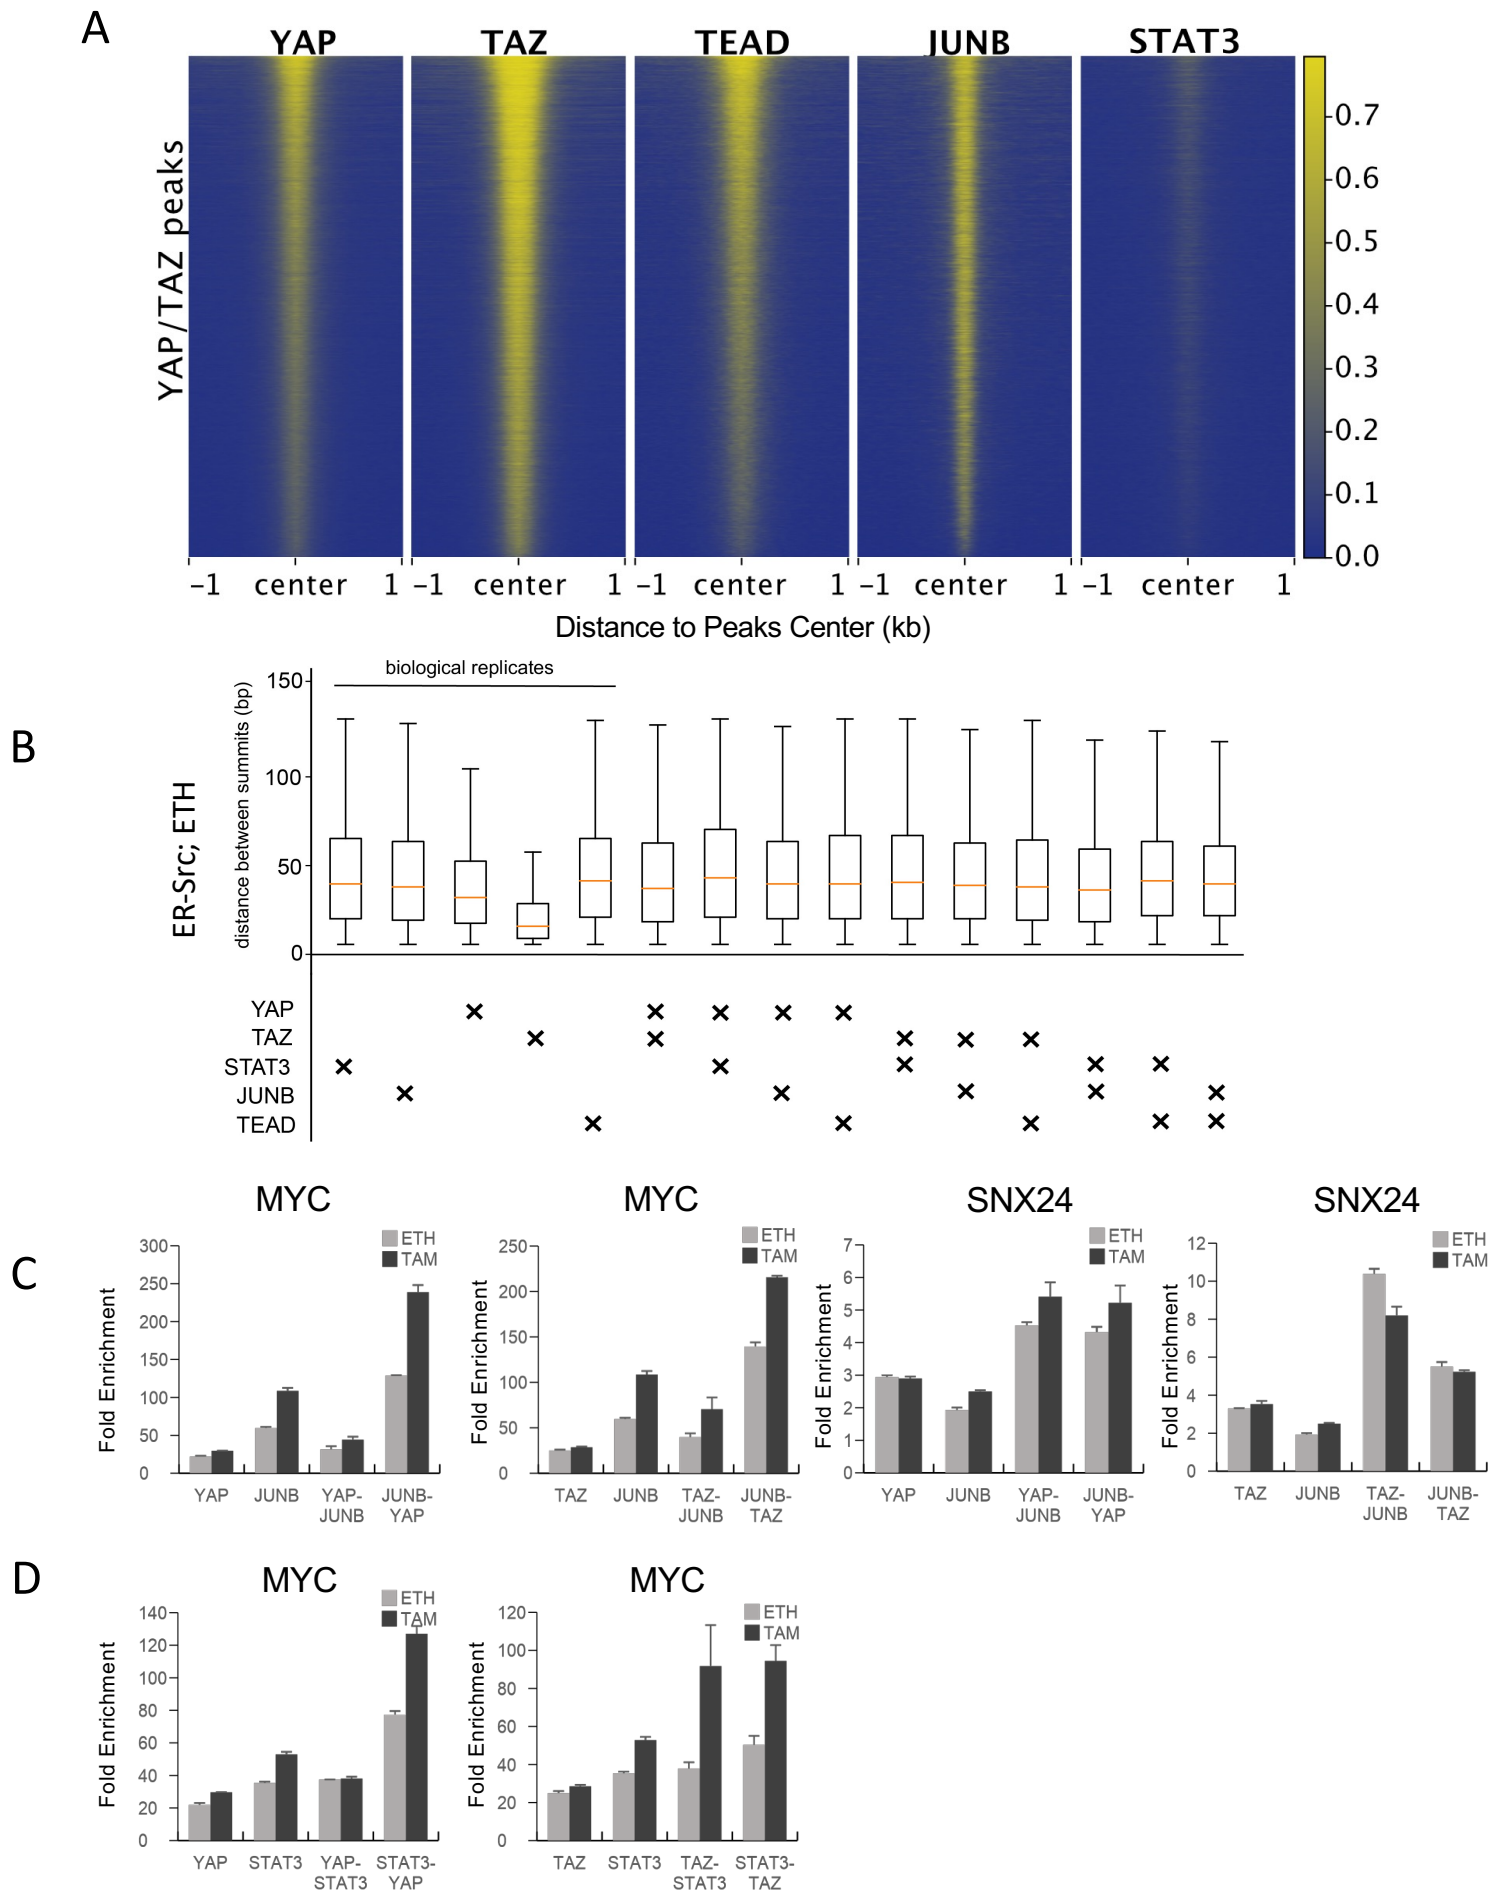

Supplement: supp [file elife-67312-supp-v1.zip]

**Figure 4-figure supplement 1**

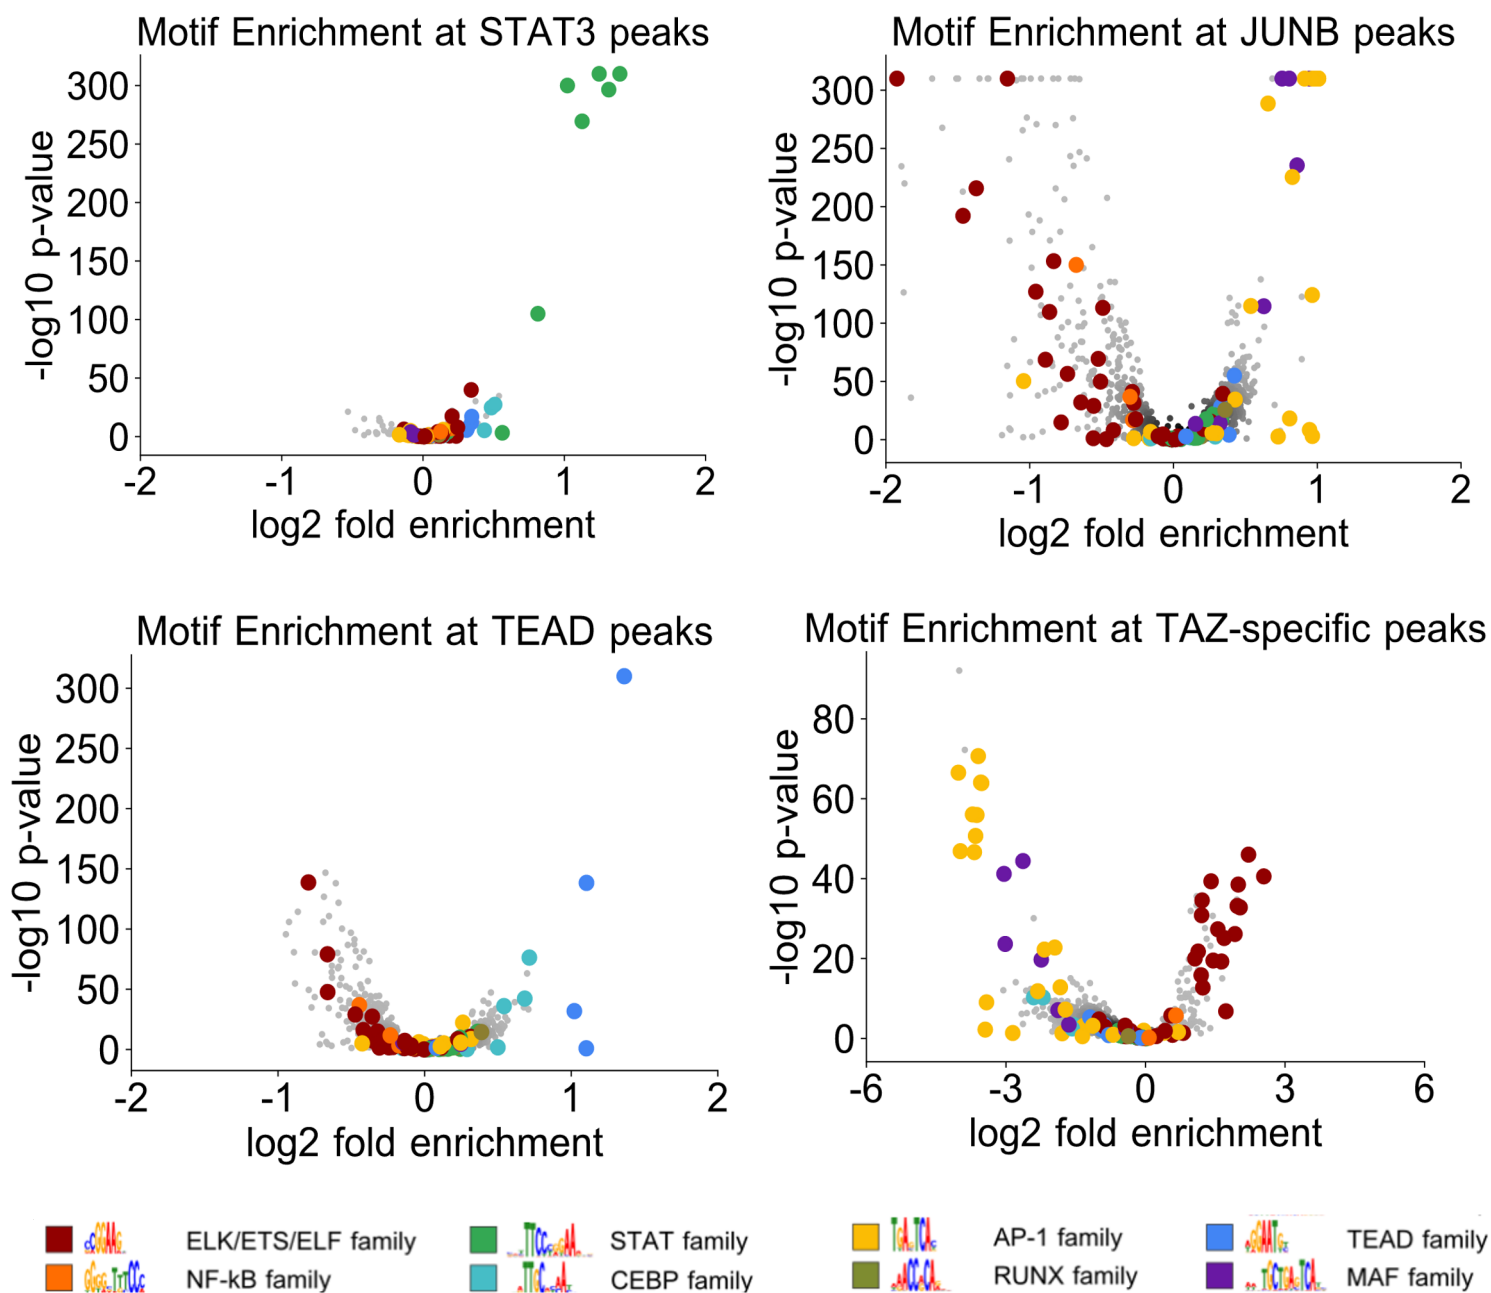

Supplement: supp [file elife-67312-supp-v1.zip]

Figure 7-figure supplement 2

A

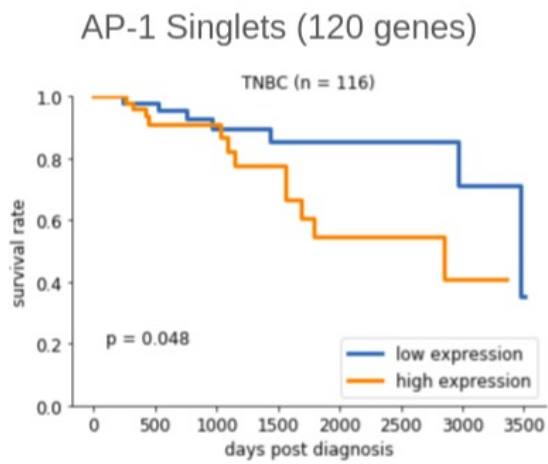

B

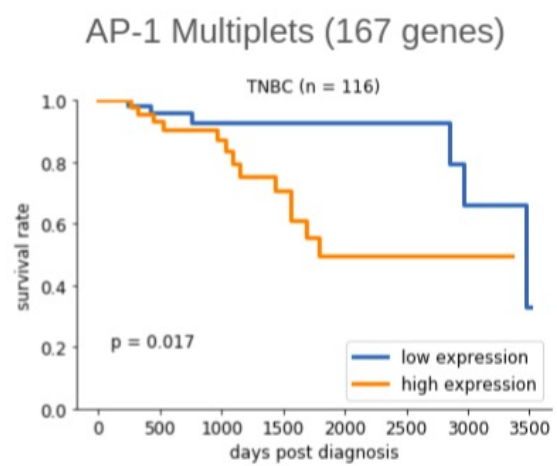

C

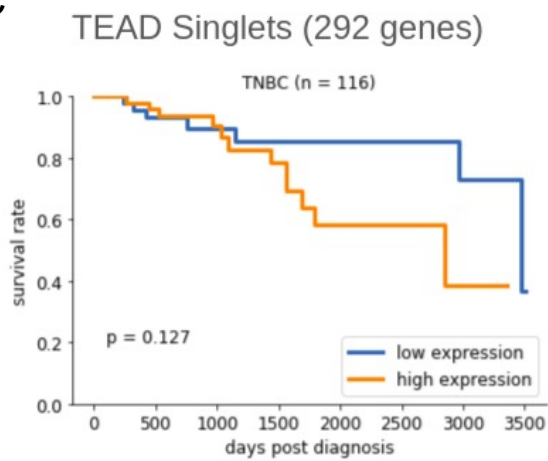

D

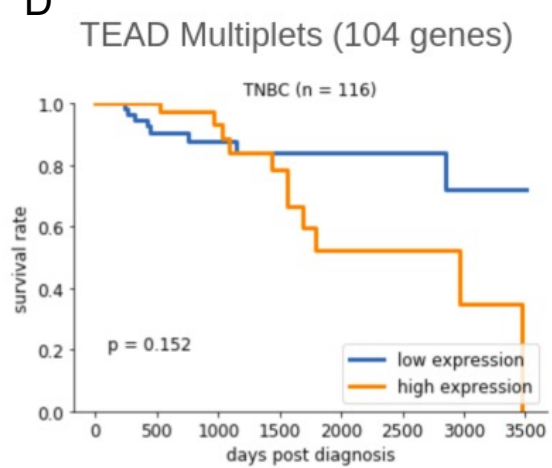

Supplement: supp [file elife-67312-supp-v1.zip]

Figure 6-figure supplement 2

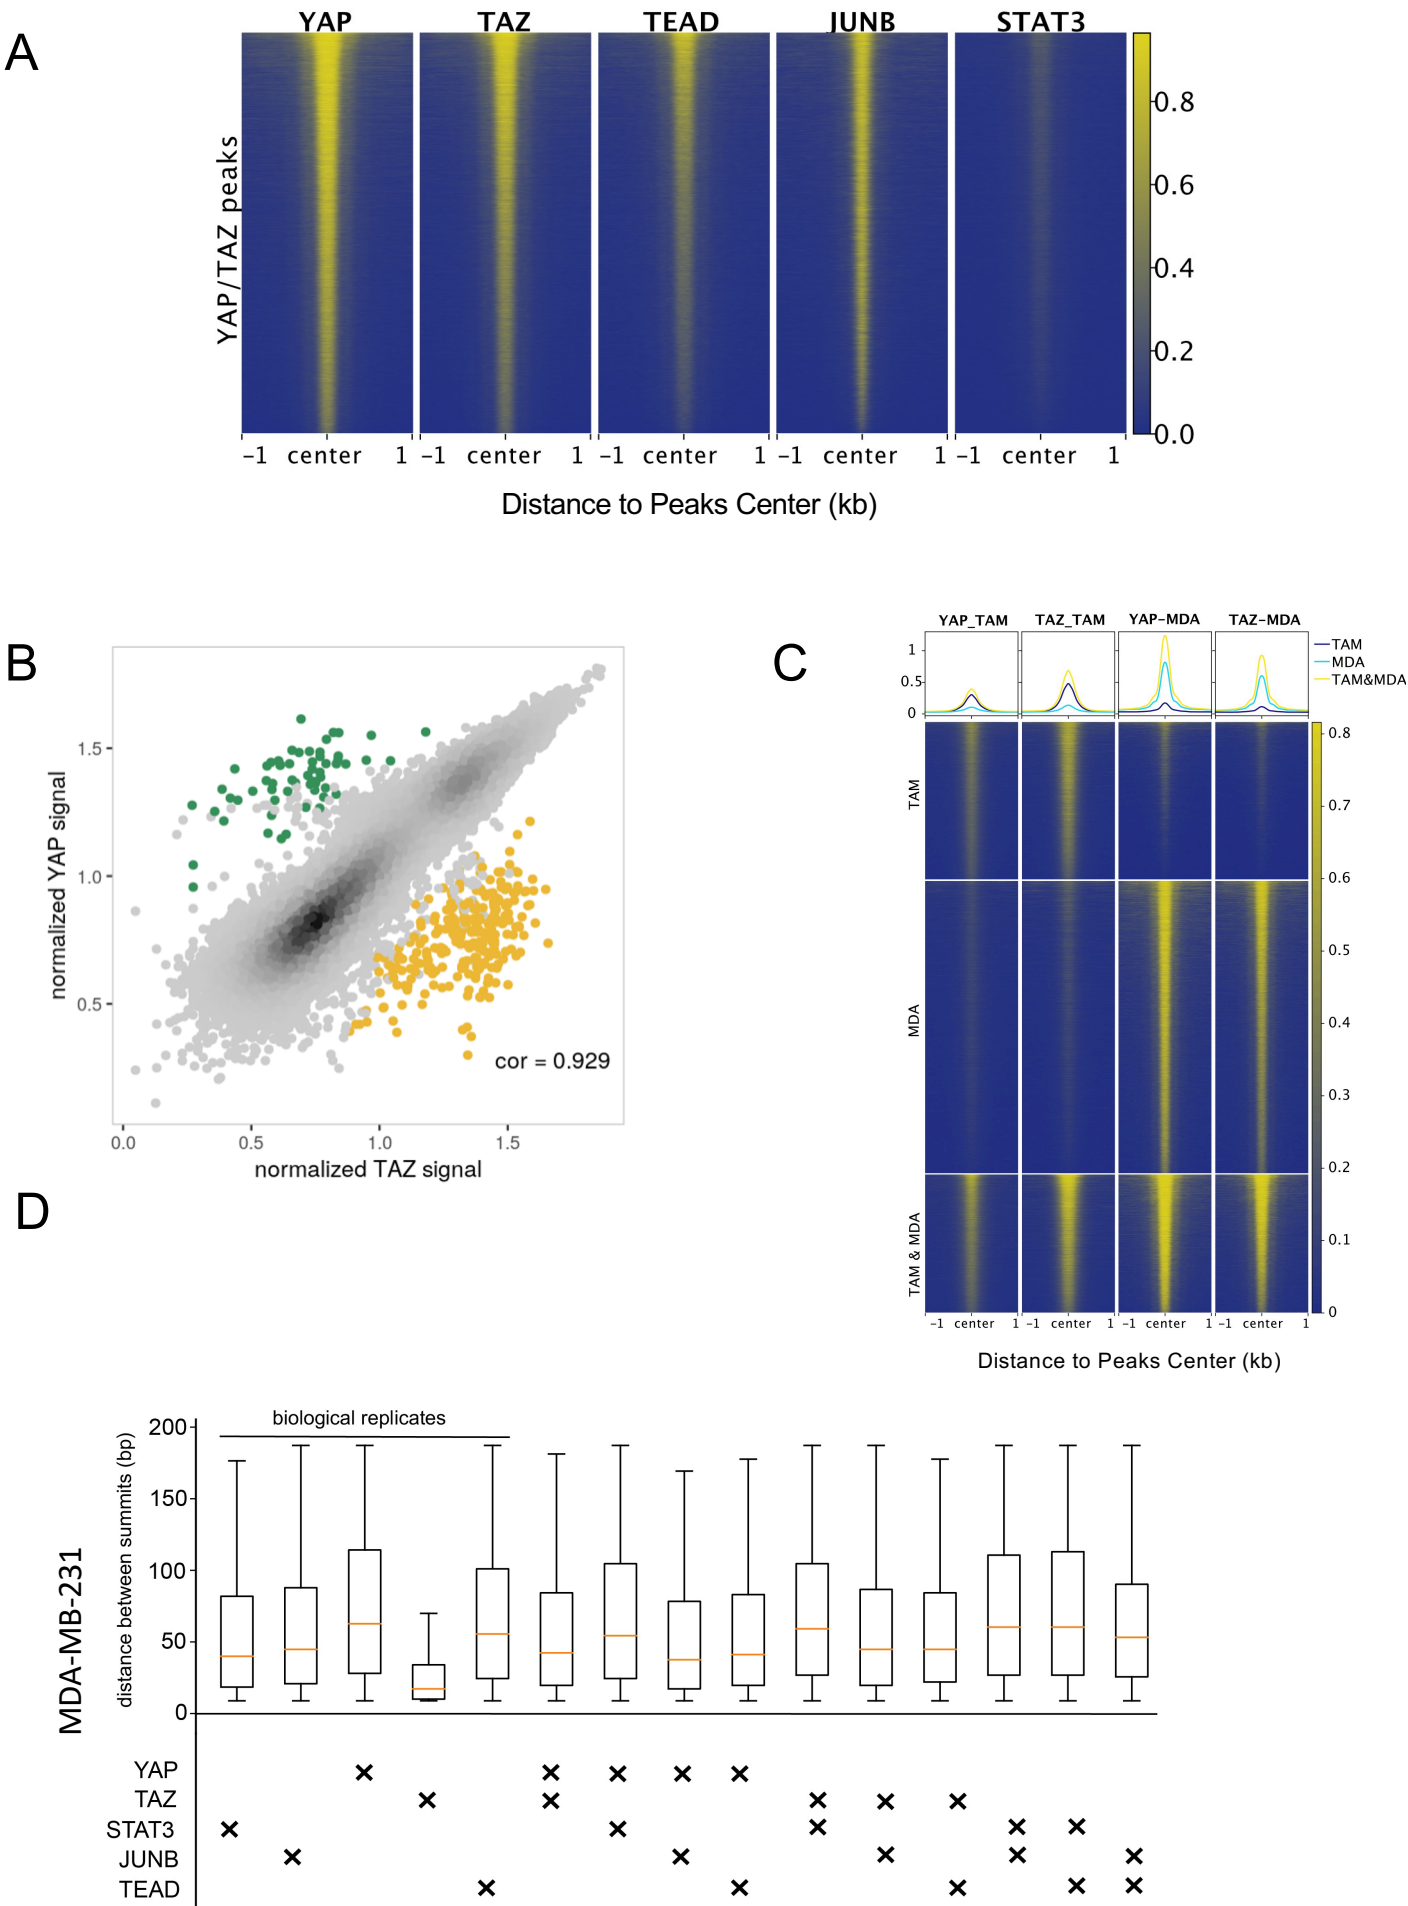

Supplement: supp [file elife-67312-supp-v1.zip]

Figure 2-figure supplement 1

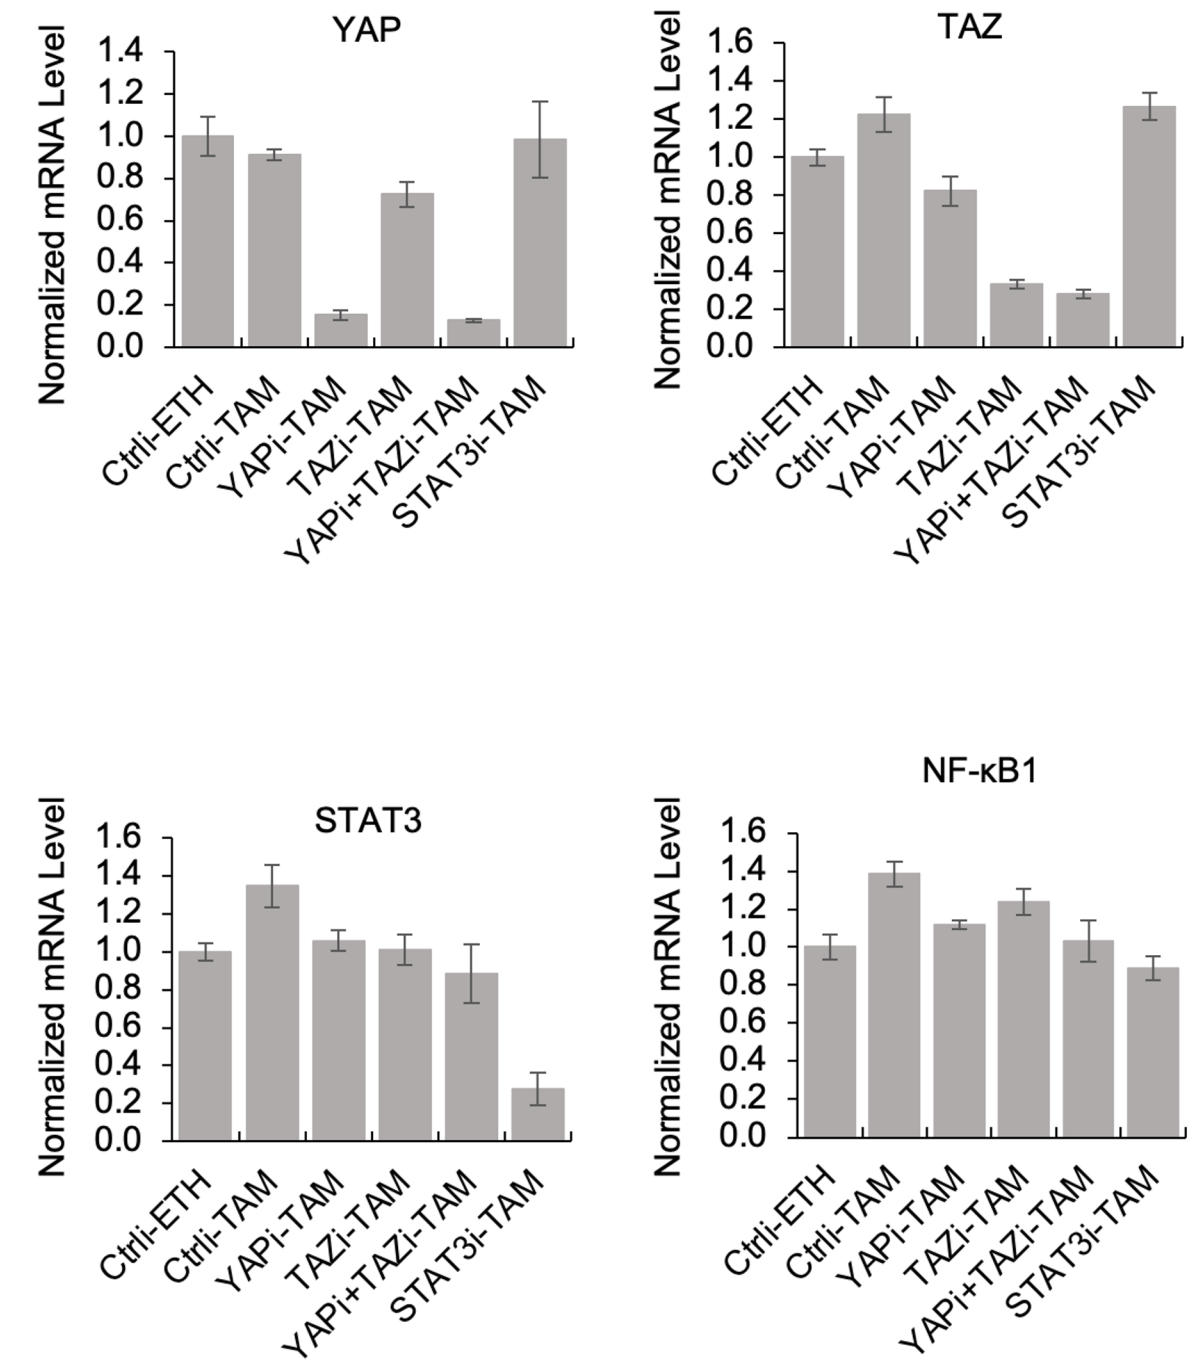

Supplement: supp [file elife-67312-supp-v1.zip › elife_poa_e67312_Figure_2_figure_supplement_1.pdf]

**Figure 6-figure supplement 1**

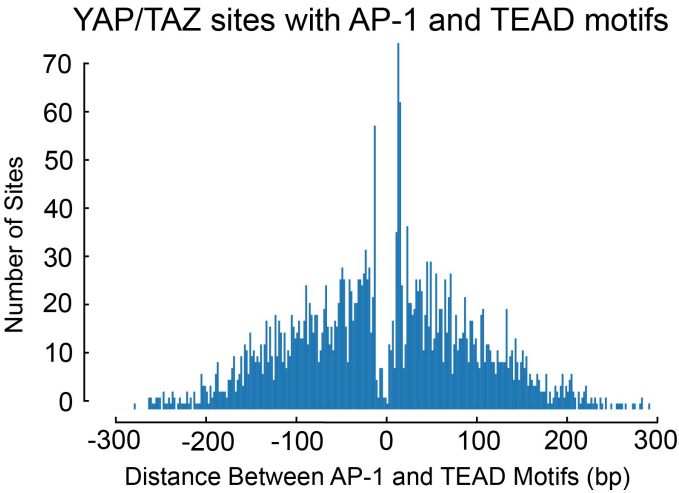

Supplement: supp [file elife-67312-supp-v1.zip › elife_poa_e67312_Figure_6_figure_supplement_1.pdf]
